# Supplementary material for: Atmospheric oxidation pathways of CF3CH2CFCl2 (HCFC-234fb) with OH-radicals and Cl-atoms: insights into the mechanism, thermodynamics, and kinetics
Source: Royal Society of Chemistry journal article supplement (doi:10.1039/d4cp01643b), 2024-01-01
Supplement: d4cp01643b1.pdf [file d4cp01643b1.pdf]

## Supporting Information

### **Atmospheric oxidation pathways of CF<sub>3</sub>CH<sub>2</sub>CFCl<sub>2</sub> (HCFC-234fb) with OH-radicals and Cl-atoms: insights into the mechanism, thermodynamics, and kinetics**

Rabu Ranjan Changmai, Samsung Raja Daimari, Anand Kumar Yadav, and Manabendra Sarma\*

*Department of Chemistry, IIT Guwahati, Guwahati -781039, Assam, India*

E-mail: [msarma@iitg.ac.in](mailto:msarma@iitg.ac.in)

The Supporting Information contains the vibrational frequencies of the species to confirm the transition states at M06-2X and MP2 level of theories involved in the reaction of DTP with OH-radical and Cl-atom. The Supporting Information also contains the absolute energies, Gibbs free energies, and enthalpies of all the species involved in the reactions. The IRC comparison plots have been provided for all the reaction channels. The Supporting Information also contains all the equilibrium constants, unimolecular rate coefficients and overall rate coefficients for all the reaction channels in the temperature range 200-400 K.

## Table of Contents

**Table S1:** Energy of CF<sub>3</sub>CH<sub>2</sub>CFCl<sub>2</sub> (DTP) molecule for every 10° rotation of the C-C bond to get the optimized conformers.

**Notes 1: Molecular Electrostatic Potential Surface Studies.**

**Figure S1:** Computed molecular electrostatic potential maps for (a) DTP, (b) OH-radical, and (c) Cl-atom at the **MP2/cc-pVTZ** theoretical level.

**Figure S2:** Optimized structures of all the species involved in the oxidation of DTP by OH-radical and Cl-atom at the **MP2/cc-pVTZ** level of theory.

**Table S2:** Vibrational frequencies of the reactants, pre-reactive complexes, transition states, product complexes, and products for the reaction of CFP and OH radicals calculated at the **M06-2X/cc-pVTZ level of theory**. All the frequency values are in cm<sup>-1</sup>.

**Table S3:** Vibrational frequencies of the reactants, pre-reactive complexes, transition states, product complexes, and products for the reaction calculated at the **MP2/cc-pVTZ level of theory**. All the frequency values are in cm<sup>-1</sup>.

**Table S4:** The corrected zero-point energies (EE+ZPE), enthalpies (H), and Gibbs free energies (G) of all the species calculated at the **M06-2X/cc-pVTZ level of theory**. All energies are in Hartree.

**Table S5:** The corrected zero-point energies (EE+ZPE), enthalpies (H), and Gibbs free energies (G) of all the species calculated at the **MP2/cc-pVTZ level of theory**. All energies are in Hartree.

**Table S6:** Intrinsic reaction coordinate (IRC) data for the reaction of DTP with OH-radical calculated at the **MP2/cc-pVTZ level of theory (R1A)**.

**Table S7:** Intrinsic reaction coordinate (IRC) data for the reaction of DTP with OH-radical calculated at the **MP2/cc-pVTZ level of theory (R2A)**.

**Table S8:** Intrinsic reaction coordinate (IRC) data for the abstraction of Cl-atom of DTP by OH-radical calculated at the **MP2/cc-pVTZ level of theory (R3A)**.

**Table S9:** Intrinsic reaction coordinate (IRC) data for the abstraction of Cl-atom of DTP by OH-radical calculated at the **MP2/cc-pVTZ level of theory (R4A)**.

**Figure S3:** Intrinsic reaction coordinate (IRC) plots for R1A-R2A and R3A-R4A at the **MP2/cc-pVTZ level of theory**.

**Table S10:** Intrinsic reaction coordinate (IRC) data for the abstraction of H-atom of DTP by Cl-atom calculated at the **MP2/cc-pVTZ level of theory (R1B)**.

**Table S11:** Intrinsic reaction coordinate (IRC) data for the abstraction of H-atom of DTP by Cl-atom calculated at the **MP2/cc-pVTZ level of theory (R2B)**.

**Table S12:** Intrinsic reaction coordinate (IRC) data for the abstraction of Cl-atom of DTP with Cl-atom calculated at the **MP2/cc-pVTZ level of theory (R3B)**.

**Table S13:** Intrinsic reaction coordinate data (IRC) for the abstraction of Cl-atom of DTP with Cl-atom calculated at the **MP2/cc-pVTZ level of theory (R4B)**.

**Figure S4:** Intrinsic reaction coordinate (IRC) plots for the R1B-R2B and R3B-R4B at the **MP2/cc-pVTZ level of theory**.

**Table S14:** Single point energy calculated at the **CCSD (T)/aug-cc-pVTZ//MP2/cc-pVTZ level of theory** of all the species involved in the reaction (A).

**Table S15:** Single point energy calculated at the **CCSD (T)/aug-cc-pVTZ//MP2/cc-pVTZ level of theory** of all the species involved in the reaction (B).

**Table S16:** Relative energies of the species involved in the reaction of DTP with  $\cdot\text{OH}$  and Cl at the **CCSD(T)/aug-cc-pVTZ//MP2/cc-pVTZ level of theory**. Energies are in kcal/mol.

**Table S17:** *T1*-diagnostic and spin-contamination values,  $\langle S^2 \rangle$  for all the stationary points involved in the reaction of DTP with OH-radical calculated at the **CCSD(T)/aug-cc-pVTZ level of theory**.

**Table S18:** *T1*-diagnostic and spin-contamination values,  $\langle S^2 \rangle$  for all the stationary points involved in the reaction of DTP with Cl-atom calculated at the **CCSD(T)/aug-cc-pVTZ level of theory**.

**Table S19:** Calculated Equilibrium constant ( $K_{eq}$ ), unimolecular rate coefficient ( $k_{uni}$ ) and overall rate coefficients ( $k_{1A}$ ,  $k_{2A}$ ,  $k_{3A}$ ,  $k_{4A}$ ) for the reaction channel **R1A**, **R2A**, **R3A**, and **R4A** in the 200-400 K temperature range at the **M06-2X level of theory**. Units of rate coefficients are in  $\text{cm}^3 \text{ molecule}^{-1} \text{ s}^{-1}$ .

**Table S20:** Calculated overall rate coefficients for the reaction of  $\text{CCl}_2\text{FCH}_2\text{CF}_3$  with OH-radical in the 200-400 K temperature range at the **M06-2X level of theory**. Units are in  $\text{cm}^3 \text{ molecule}^{-1} \text{ s}^{-1}$ .

**Table S21:** Calculated Equilibrium constant ( $K_{eq}$ ), unimolecular rate coefficient ( $k_{uni}$ ) and overall rate coefficients ( $k_{1B}$ ,  $k_{2B}$ ,  $k_{3B}$ ,  $k_{4B}$ ) for the reaction channel **R1B**, **R2B**, **R3B**, and **R4B** in the 200-400 K temperature range at the **M06-2X level of theory**. Units of rate coefficients are in  $\text{cm}^3 \text{ molecule}^{-1} \text{ s}^{-1}$ .

**Table S22:** Calculated overall rate coefficients for the reaction of  $\text{CCl}_2\text{FCH}_2\text{CF}_3$  with Cl-atom in the 200-400 K temperature range at the **M06-2X level of theory**. Units are in  $\text{cm}^3 \text{ molecule}^{-1} \text{ s}^{-1}$ .

**Notes 2: Eckart Unsymmetrical Potential Barrier.**

**Table S23:** Vibrational frequencies which are treated as hindered rotors for the species involved in the dominant reaction channels (R1A, R2A, R1B, and R2B) calculated at the **M06-2X/cc-pVTZ level of theory**. Units are in  $\text{cm}^{-1}$ .

**Notes 3: Hindered Rotor (HR) Approximation.**

**Table S24:** Calculated Eckart tunneling contributions ( $\Gamma_x$ ,  $x = \text{OH-1A, OH-2A, OH-3A, OH-4A}$ ) for all the four reaction channels (R1A, R2A, R3A, R4A) involved in the reaction of DTP with  $\cdot\text{OH}$  in the temperature range of 200-400 K using Eyringpy Program code at the **M06-2X level of theory**.

**Table S25:** Calculated Eckart tunneling contributions ( $\Gamma_x$ ,  $x = \text{Cl-1B, Cl-2B, Cl-3B, Cl-4B}$ ) for all the four reaction channels (R1B, R2B, R3B, R4B) involved in the reaction of DTP with Cl-atom in the temperature range of 200-400 K using Eyringpy Program code at the **M06-2X level of theory**.

**Table S26: Branching ratio** for the reaction of DTP with OH-radical in the 200-400 K temperature range.

**Table S27: Branching ratio** for the reaction of DTP with Cl-atom in the 200-400 K temperature range.

**Notes 4: Radiative Efficiency Calculations.**

**Table S28:** Frequencies and intensities of  $\text{CF}_3\text{CH}_2\text{CFCl}_2$  calculated at the **M06-2X level of theory**.

**Table S1:** Energy of the CF<sub>3</sub>CH<sub>2</sub>CFCl<sub>2</sub> (DTP) molecule for every 10° rotation of the C-C bond to get the optimized conformers.

| Scan (°) | Energy (Hartree) |
|----------|------------------|
| 0        | -1433.6211       |
| 10       | -1433.6207       |
| 20       | -1433.6195       |
| 30       | -1433.6175       |
| 40       | -1433.6153       |
| 50       | -1433.6137       |
| 60       | -1433.6134       |
| 70       | -1433.6145       |
| 80       | -1433.6165       |
| 90       | -1433.6185       |
| 100      | -1433.6198       |
| 110      | -1433.6201       |
| 120      | -1433.6201       |
| 130      | -1433.6198       |
| 140      | -1433.6187       |
| 150      | -1433.6167       |
| 160      | -1433.6147       |
| 170      | -1433.6134       |
| 180      | -1433.6136       |
| 190      | -1433.6151       |
| 200      | -1433.6173       |
| 210      | -1433.6194       |
| 220      | -1433.6207       |
| 230      | -1433.6211       |
| 240      | -1433.6210       |
| 250      | -1433.6206       |
| 260      | -1433.6197       |
| 270      | -1433.6182       |
| 280      | -1433.6166       |
| 290      | -1433.6155       |
| 300      | -1433.6156       |
| 310      | -1433.6168       |
| 320      | -1433.6184       |
| 330      | -1433.6198       |
| 340      | -1433.6206       |
| 350      | -1433.6209       |
| 360      | -1433.6211       |

### Notes 1: Molecular Electrostatic Potential Surface Studies.

The molecular electrostatic potential (MESP) studies provide a visual way to understand the various properties of the molecule. In the current work, MESP is used to predict the reactive sites of the molecule. The electrostatic potential maps of  $\text{CF}_3\text{CH}_2\text{CFCl}_2$ , OH-radical, and Cl-atom are shown in Fig. S1. The blue color indicates positive potential and red color indicates negative potential. In addition, the darker the color, greater is the magnitude of the potential. From Figure S1, we see that fluorine (F) atom is much more electronegative compared to the hydrogen (H) and chlorine (Cl)-atom. This means that breaking the C-F bond would require high energy. As a result, OH-radical cannot abstract the F-atoms. Similarly, the Cl-atom also cannot abstract the F-atom, which would necessitate extremely high energy to rupture the bonds already present.

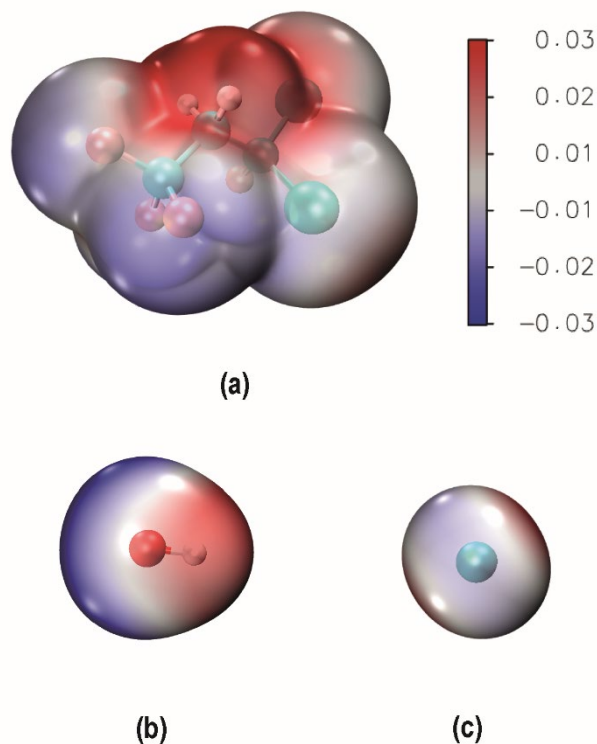

**Figure S1:** Computed molecular electrostatic potential maps for (a) DTP, (b) OH-radical, and (c) Cl-atom at the MP2/cc-pVTZ theoretical level. The color represents electron density distribution: Blue represents highest electron density site and red represents low electron density site. The isovalue of the surface is 0.02.

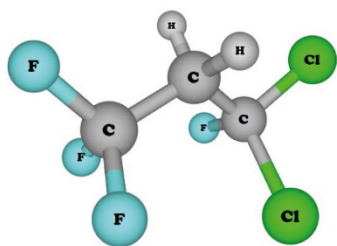

(1) DTP

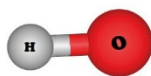

(2) OH

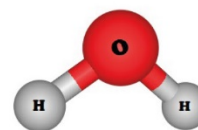

(3) Water

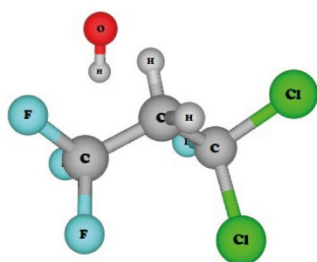

(4) CR1A

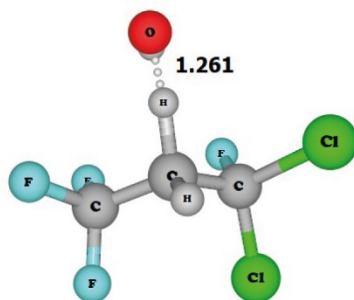

(5) TS1A

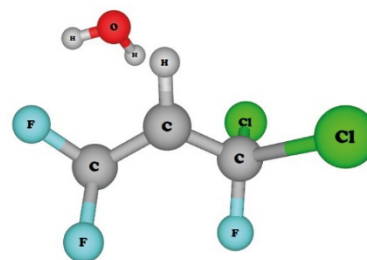

(6) PC1A

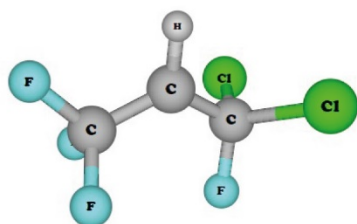

(7) P1A

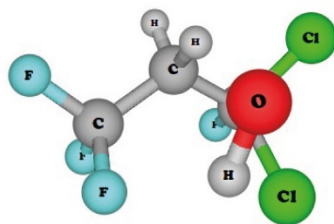

(8) CR2A

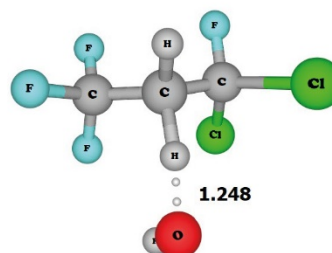

(9) TS2A

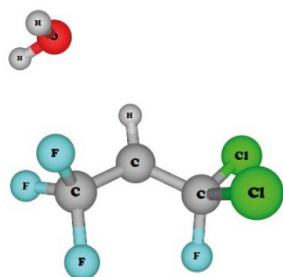

(10) PC2A

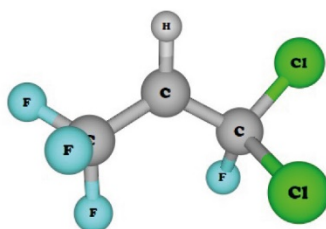

(11) P2A

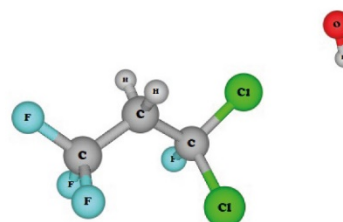

(12) CR3A

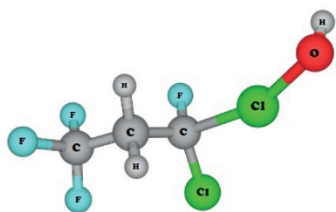

(13) TS3A

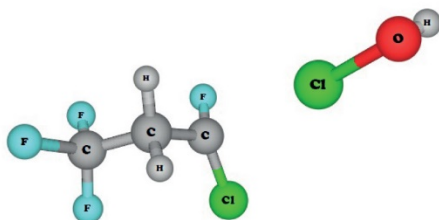

(14) PC3A

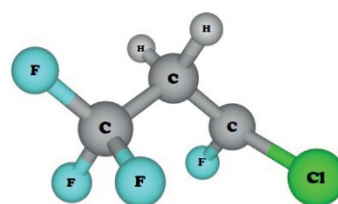

(15) P3A

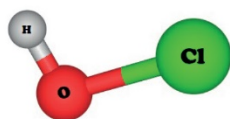

(16) HOCl

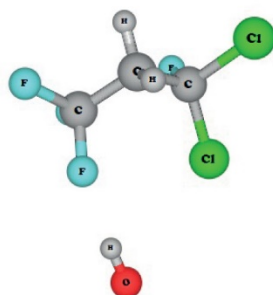

(17) CR4A

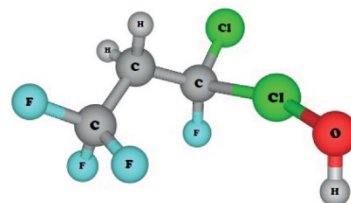

(18) TS4A

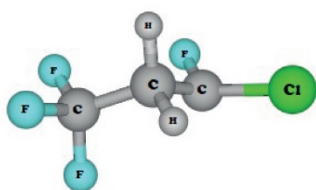

(19) PC4A

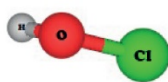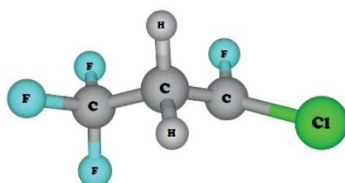

(20) P4A

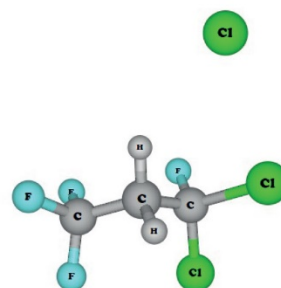

(21) CR1B

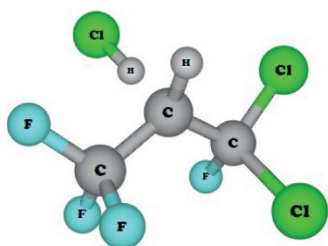

(22) TS1B

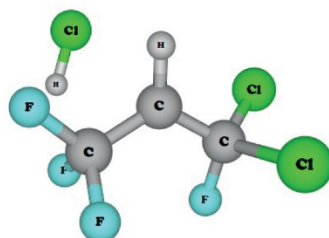

(23) PC1B

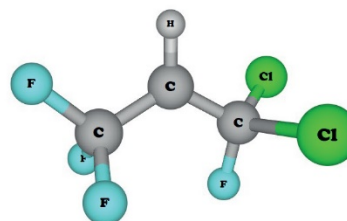

(24) P1B



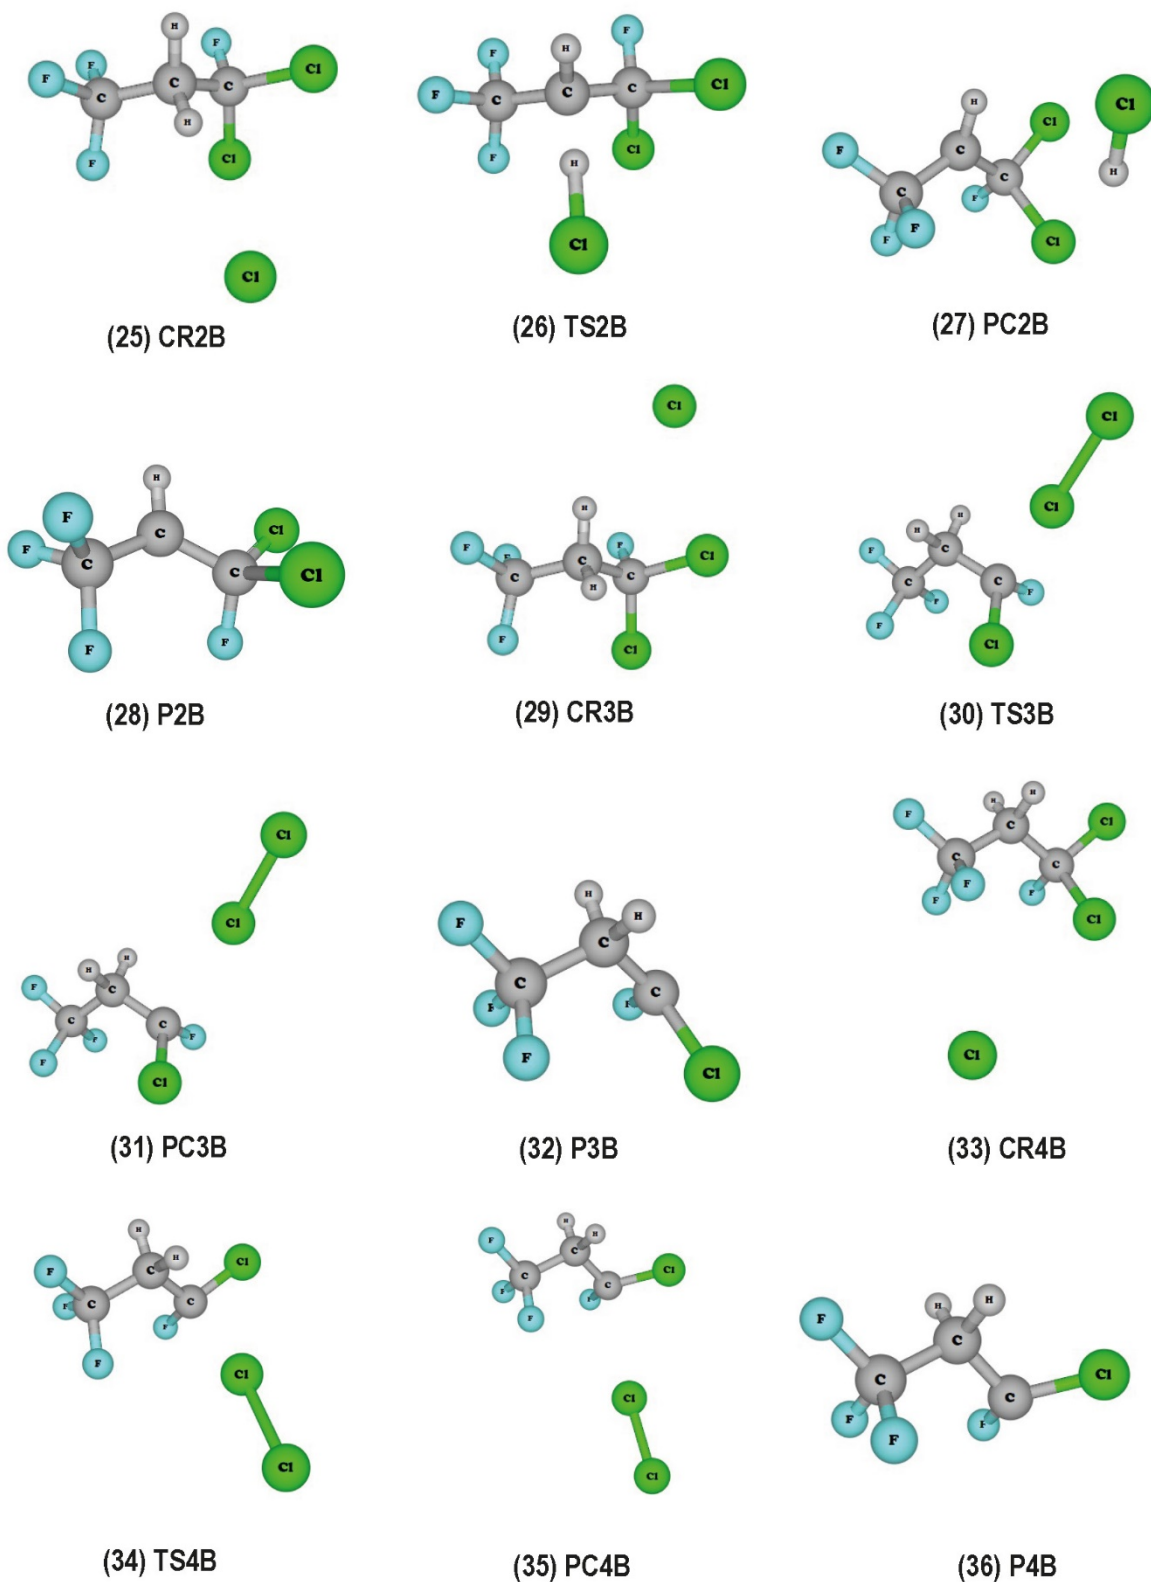

**Figure S2:** Optimized structures of all the species involved in the oxidation of DTP by OH-radical and Cl-atom at the MP2/cc-pVTZ level of theory.

**Table S2:** Vibrational frequencies of the reactants, pre-reactive complexes, transition states, product complexes, and products for the reaction of CFP and OH-radicals calculated at the **M06-2X/cc-pVTZ level of theory**. All the frequency values are in  $\text{cm}^{-1}$ .

| Reactant | OH      | CR1A    | TS1A     | PC1A    | P1A     | H <sub>2</sub> O | CR2A    | TS2A     |
|----------|---------|---------|----------|---------|---------|------------------|---------|----------|
| 30.37    | 3773.96 | 22.42   | -1599.31 | 25.68   | 27.8    | 1626.63          | 28.92   | -1668.76 |
| 123.34   |         | 66.84   | 17.20    | 27.45   | 41.16   | 3877.31          | 62.15   | 33.68    |
| 147.63   |         | 74.55   | 71.58    | 93.20   | 137.29  | 3979.36          | 85.2    | 66.95    |
| 230.95   |         | 113.64  | 87.88    | 108.48  | 215.49  |                  | 116.9   | 87.38    |
| 243.14   |         | 141.49  | 135.51   | 124.41  | 227.46  |                  | 151.83  | 138.53   |
| 306.12   |         | 158.08  | 156.93   | 136.05  | 310.95  |                  | 157.3   | 148.01   |
| 328.53   |         | 231.59  | 167.94   | 151.32  | 327.71  |                  | 232.94  | 165.54   |
| 387.17   |         | 238.22  | 229.81   | 226.62  | 330.24  |                  | 246.12  | 228.73   |
| 408.13   |         | 247.43  | 234.7    | 228.93  | 387.17  |                  | 273.78  | 246.28   |
| 467.92   |         | 307.18  | 307.07   | 271.28  | 459.7   |                  | 306.8   | 306.3    |
| 539.21   |         | 324.51  | 325.05   | 290.89  | 487.6   |                  | 330.01  | 325.75   |
| 550.41   |         | 330.01  | 337.21   | 304.86  | 544.86  |                  | 341.75  | 346.7    |
| 655.52   |         | 389.7   | 394.22   | 324.84  | 601.32  |                  | 390.73  | 391.53   |
| 702.65   |         | 415.06  | 468.34   | 332.76  | 656.41  |                  | 417.71  | 469.63   |
| 845.13   |         | 470.4   | 539.75   | 383.51  | 769.92  |                  | 468.96  | 531.95   |
| 896.61   |         | 540.46  | 546.57   | 461.27  | 825.14  |                  | 538.85  | 550.51   |
| 934.92   |         | 551.26  | 656.25   | 487.67  | 891.37  |                  | 550.94  | 655.68   |
| 1039.23  |         | 655.85  | 692.23   | 547.38  | 1022.8  |                  | 657.63  | 674.48   |
| 1179.63  |         | 700.98  | 770.11   | 601.34  | 1209.7  |                  | 696.04  | 757.09   |
| 1217.1   |         | 847.33  | 836.09   | 660.83  | 1223.48 |                  | 847.67  | 800.52   |
| 1240.74  |         | 892.84  | 862.48   | 752.36  | 1239.77 |                  | 896.37  | 850.11   |
| 1317.47  |         | 935.43  | 892.08   | 838.13  | 1298.05 |                  | 932.7   | 911.98   |
| 1345.92  |         | 1031.59 | 977.28   | 889.15  | 1426.15 |                  | 1043.1  | 974.36   |
| 1418.79  |         | 1175.23 | 1040.49  | 1025.72 | 3273.9  |                  | 1173.73 | 1045.19  |
| 1458.48  |         | 1222.39 | 1111.95  | 1187.16 |         |                  | 1223.3  | 1148.08  |
| 3113.06  |         | 1231.37 | 1212.21  | 1223.36 |         |                  | 1237.73 | 1173.62  |
| 3176.06  |         | 1305.23 | 1230.15  | 1232.89 |         |                  | 1312.9  | 1228.53  |
|          |         | 1345.69 | 1272.5   | 1291.44 |         |                  | 1347.83 | 1274.28  |
|          |         | 1424.61 | 1309.34  | 1422.97 |         |                  | 1424.81 | 1301.25  |
|          |         | 1455.75 | 1403.63  | 1617.87 |         |                  | 1461.5  | 1401.03  |
|          |         | 3115.52 | 1456.08  | 3286.94 |         |                  | 3114.07 | 1443.92  |
|          |         | 3177.96 | 3173.73  | 3859.15 |         |                  | 3180.4  | 3152.61  |
|          |         | 3761.52 | 3771.74  | 3959.79 |         |                  | 3757.88 | 3775.94  |

| PC2A    | P2A     | CR3A    | TS3A    | PC3A    | P3A     | HOCI    | CR4A    | TS4A    |
|---------|---------|---------|---------|---------|---------|---------|---------|---------|
|         |         |         |         |         |         |         |         |         |
| 25.62   | 27.17   | 27.04   | -364.13 | 23.12   | 30.58   | 806.01  | 21.81   | -348.29 |
| 49.94   | 53.59   | 62.11   | 24.73   | 29.93   | 90.58   | 1284.91 | 65.38   | 30.4    |
| 64.05   | 145.2   | 68.72   | 40.43   | 35.89   | 126.36  | 3849.46 | 82.14   | 57.47   |
| 73.28   | 223.6   | 119.47  | 79.17   | 65.5    | 262.78  |         | 119.59  | 84.1    |
| 96.63   | 244.16  | 139.49  | 88.39   | 81.64   | 304.76  |         | 144.43  | 114.45  |
| 129.85  | 294.22  | 147.98  | 121.96  | 86      | 391.71  |         | 161.51  | 122.36  |
| 154.43  | 312.68  | 224.5   | 145.49  | 92.22   | 412.98  |         | 230.86  | 153.33  |
| 217.5   | 326.54  | 233.2   | 168.02  | 115.11  | 486.92  |         | 245.13  | 185.4   |
| 229.9   | 390.19  | 244.09  | 213     | 129.98  | 542.61  |         | 272.63  | 202.03  |
| 254.15  | 464.43  | 306.4   | 278.14  | 264.18  | 548.82  |         | 312.14  | 272.17  |
| 261.11  | 509.06  | 328.53  | 287.08  | 307.03  | 670.4   |         | 327.21  | 294.92  |
| 301.5   | 542.8   | 357.02  | 324.07  | 395.7   | 736.62  |         | 330.68  | 323.27  |
| 324.45  | 621.15  | 391.74  | 402.19  | 418.5   | 861.18  |         | 381.59  | 376.99  |
| 376.87  | 665.42  | 412.8   | 439.2   | 497.9   | 931.84  |         | 420.86  | 439.35  |
| 402.29  | 731.85  | 468.48  | 536.95  | 543.29  | 1066.94 |         | 466.44  | 519.48  |
| 465.2   | 852.57  | 539.79  | 546.31  | 550.63  | 1187.96 |         | 545.96  | 545.45  |
| 527.78  | 892.55  | 551.35  | 576.51  | 676.73  | 1224.85 |         | 547.26  | 566.59  |
| 543.37  | 1034.5  | 655.81  | 689.46  | 737.79  | 1286.07 |         | 650.78  | 659.79  |
| 634.23  | 1194.13 | 705.24  | 738.36  | 778.9   | 1321.89 |         | 708.78  | 813.51  |
| 664.56  | 1213.05 | 843.91  | 870.65  | 862.95  | 1347.7  |         | 840.95  | 875.56  |
| 731.06  | 1231.26 | 895.27  | 932.67  | 931.98  | 1389.5  |         | 881.25  | 935.09  |
| 850.16  | 1326.91 | 934.07  | 1058.62 | 1069.48 | 1450.76 |         | 957.79  | 1045.24 |
| 890.63  | 1419.9  | 1034.31 | 1114.5  | 1189.51 | 3101.19 |         | 1034.13 | 1133.82 |
| 1035.61 | 3260.71 | 1178.19 | 1187.77 | 1226.96 | 3163.29 |         | 1184.22 | 1168.87 |
| 1174.54 |         | 1221.84 | 1222.62 | 1275.5  |         |         | 1216.65 | 1223.37 |
| 1198.48 |         | 1232.5  | 1280.47 | 1286.87 |         |         | 1241.22 | 1277.81 |
| 1231.34 |         | 1316.36 | 1314.16 | 1320.98 |         |         | 1309.8  | 1317.75 |
| 1330.95 |         | 1346.42 | 1341.94 | 1347.64 |         |         | 1344.27 | 1335.2  |
| 1420.62 |         | 1422.78 | 1397.26 | 1392.24 |         |         | 1426.48 | 1416.66 |
| 1630.06 |         | 1464.34 | 1451.36 | 1449.89 |         |         | 1461.74 | 1457.01 |
| 3252.84 |         | 3113.83 | 3112.3  | 3102.29 |         |         | 3116.24 | 3084.14 |
| 3861.29 |         | 3176.48 | 3173.65 | 3163.36 |         |         | 3180.47 | 3158.02 |
| 3958.16 |         | 3762.49 | 3837.2  | 3845.86 |         |         | 3761.81 | 3835.16 |

| <b>PC4A</b> | <b>P4A</b> | <b>CR1B</b> | <b>TS1B</b> | <b>PC1B</b> | <b>P1B</b> | <b>HCI</b> | <b>CR2B</b> | <b>TS2B</b> |
|-------------|------------|-------------|-------------|-------------|------------|------------|-------------|-------------|
|             |            |             |             |             |            |            |             |             |
| 31.82       | 27.67      | 16.86       | -946.43     | 22.43       | 28.52      | 2995.06    | 35.43       | -1010.56    |
| 13.4        | 80.45      | 35.08       | 21.64       | 27.05       | 54         |            | 38.13       | 30.83       |
| 43.43       | 140.85     | 52.2        | 45.56       | 39.01       | 144.59     |            | 66.34       | 41.59       |
| 56.37       | 262.79     | 98.84       | 69.41       | 70.44       | 223.13     |            | 106.96      | 68.9        |
| 67.43       | 311.28     | 126.14      | 106.55      | 78          | 243.62     |            | 135.36      | 100.82      |
| 74.29       | 362.68     | 148.43      | 152.85      | 148.06      | 295.04     |            | 149.29      | 144.59      |
| 106.21      | 416        | 234.99      | 218.03      | 185.68      | 312.75     |            | 232.54      | 224.85      |
| 123.88      | 437.43     | 244.75      | 227.89      | 221.6       | 325.58     |            | 244.09      | 240.59      |
| 147.45      | 544.04     | 306.13      | 301.28      | 240.04      | 389.9      |            | 307.04      | 302.37      |
| 259.7       | 551.25     | 328.36      | 321.3       | 278.47      | 464.76     |            | 329.87      | 315.18      |
| 314.5       | 656.3      | 385.26      | 330.72      | 301.86      | 509.2      |            | 389.47      | 356.25      |
| 365.76      | 803.25     | 407.07      | 392.91      | 322.55      | 542.92     |            | 414.38      | 389.56      |
| 419.04      | 873.64     | 465.43      | 467.42      | 334.09      | 621.98     |            | 467.73      | 439.76      |
| 436.95      | 923.47     | 539.33      | 491.16      | 392.31      | 664.69     |            | 538.68      | 481.46      |
| 545.04      | 1064.65    | 551.07      | 546.38      | 464.54      | 733.01     |            | 550.56      | 533.69      |
| 553.97      | 1167.39    | 653.96      | 547.68      | 515.55      | 850.41     |            | 655.73      | 553.26      |
| 660.31      | 1233.45    | 702.92      | 655.88      | 543.21      | 891.74     |            | 690.17      | 663.99      |
| 791.28      | 1282.2     | 833.67      | 715.39      | 629.4       | 1035.14    |            | 847.29      | 695.03      |
| 823.58      | 1327.47    | 894.64      | 802.04      | 663.68      | 1194.15    |            | 894.92      | 768.75      |
| 876.88      | 1338.95    | 934.11      | 841.37      | 736.57      | 1214.27    |            | 936.55      | 785.32      |
| 927.44      | 1406.9     | 1042.49     | 851.99      | 844.89      | 1231.51    |            | 1038.96     | 854.36      |
| 1060.07     | 1452.38    | 1182.96     | 895.24      | 889.11      | 1327.42    |            | 1176.53     | 917.29      |
| 1162.88     | 3060.74    | 1222.24     | 1012.94     | 1033.71     | 1420.65    |            | 1221.16     | 1079.55     |
| 1229.04     | 3166.26    | 1246.68     | 1104.04     | 1188.42     | 3261       |            | 1244.67     | 1098.6      |
| 1278.35     |            | 1318.02     | 1225.17     | 1202.32     |            |            | 1315.7      | 1166.43     |
| 1284.64     |            | 1347.98     | 1233.58     | 1238.52     |            |            | 1346.27     | 1224.35     |
| 1325.02     |            | 1421.47     | 1244.65     | 1332.37     |            |            | 1421.95     | 1258.16     |
| 1337.24     |            | 1458.14     | 1322.14     | 1420.28     |            |            | 1459.59     | 1306.26     |
| 1415.25     |            | 3108.05     | 1399.36     | 2974.03     |            |            | 3113.4      | 1397.48     |
| 1454.99     |            | 3174.43     | 3198.38     | 3258.63     |            |            | 3177.46     | 3182.69     |
| 3057.34     |            |             |             |             |            |            |             |             |
| 3147.14     |            |             |             |             |            |            |             |             |
| 3847.92     |            |             |             |             |            |            |             |             |

| <b>PC2B</b> | <b>P2B</b> | <b>CR3B</b> | <b>TS3B</b> | <b>PC3B</b> | <b>P3B</b> | <b>Cl<sub>2</sub></b> | <b>CR4B</b> | <b>TS4B</b> |
|-------------|------------|-------------|-------------|-------------|------------|-----------------------|-------------|-------------|
|             |            |             |             |             |            |                       |             |             |
| 35.96       | 25.76      | 25.38       | -268.6      | 22.11       | 29.44      | 578.37                | 37.12       | -295.09     |
| 38.09       | 52         | 34.33       | 25.1        | 24.96       | 90.29      |                       | 38.58       | 34.34       |
| 56.11       | 145.09     | 53.34       | 37.68       | 38.15       | 125.59     |                       | 66.31       | 39.3        |
| 68.56       | 223.22     | 101.22      | 54.04       | 63.24       | 262.64     |                       | 105.02      | 63.85       |
| 97.57       | 244.02     | 127.63      | 97.58       | 74.61       | 304.28     |                       | 136.09      | 94.27       |
| 140.57      | 293.07     | 147.33      | 112.34      | 80.63       | 391.02     |                       | 151.12      | 137.36      |
| 195.76      | 311.13     | 235.33      | 137.6       | 93.09       | 412.6      |                       | 232.46      | 152.5       |
| 229.4       | 326.52     | 244.96      | 175.04      | 130.89      | 486.84     |                       | 243.85      | 172.78      |
| 243.22      | 389.59     | 306.2       | 229.58      | 264.66      | 542.5      |                       | 306.98      | 239.13      |
| 261.07      | 464.75     | 328.06      | 273         | 307.02      | 548.79     |                       | 329.59      | 267.6       |
| 305.92      | 508.06     | 386.4       | 313.99      | 395.34      | 670.37     |                       | 389.14      | 318.71      |
| 324.16      | 542.99     | 409.73      | 400.92      | 419.78      | 736.54     |                       | 413.41      | 368.13      |
| 345.83      | 620.1      | 464.95      | 435.56      | 502.5       | 861.17     |                       | 467.84      | 440.65      |
| 389.42      | 664.68     | 539.28      | 522.14      | 521.82      | 931.34     |                       | 538.47      | 466.7       |
| 466.73      | 731.13     | 551.08      | 544.92      | 543.17      | 1066.19    |                       | 550.92      | 545.08      |
| 495.12      | 850.68     | 654.04      | 557.74      | 551.18      | 1187.78    |                       | 655.72      | 556.44      |
| 541.62      | 892.13     | 703.42      | 689.11      | 679.83      | 1224.78    |                       | 691.55      | 662.64      |
| 607.92      | 1035.11    | 832.98      | 741.2       | 738.75      | 1285.99    |                       | 847.93      | 820.25      |
| 669.08      | 1193.78    | 894.48      | 869.62      | 863.56      | 1321.9     |                       | 895.17      | 878.01      |
| 720.27      | 1214.19    | 934.04      | 935.4       | 932.23      | 1346.98    |                       | 935.3       | 931.32      |
| 861.64      | 1231.55    | 1043.08     | 1068.87     | 1069.14     | 1388.92    |                       | 1038.35     | 1056.49     |
| 901.38      | 1328.21    | 1182.1      | 1195.27     | 1190.83     | 1450.17    |                       | 1175.75     | 1166.05     |
| 1043.13     | 1421.01    | 1222.79     | 1228.53     | 1227.79     | 3101.29    |                       | 1220.99     | 1227.8      |
| 1170.72     | 3258.32    | 1246.61     | 1289.55     | 1287.98     | 3163.47    |                       | 1243.45     | 1291.61     |
| 1200.62     |            | 1317.5      | 1317.93     | 1320.62     |            |                       | 1315.73     | 1324.42     |
| 1231.81     |            | 1347.44     | 1345.77     | 1346.78     |            |                       | 1344.94     | 1340.97     |
| 1321.14     |            | 1421.34     | 1391.08     | 1389.71     |            |                       | 1420.51     | 1416.15     |
| 1420.43     |            | 1459.99     | 1451.36     | 1449.42     |            |                       | 1458.87     | 1454.15     |
| 2964.21     |            | 3112        | 3112.63     | 3102.1      |            |                       | 3112.3      | 3078.12     |
| 3273.73     |            | 3176.17     | 3175.22     | 3163.71     |            |                       | 3174.67     | 3152.49     |

| <b>PC4B</b> | <b>P4B</b> |
|-------------|------------|
|             |            |
| 18.87       | 31.17      |
| 28.53       | 80.62      |
| 42.99       | 140.9      |
| 61.73       | 262.38     |
| 64          | 311.33     |
| 69.25       | 362.71     |
| 105.71      | 416.81     |
| 145.89      | 438.07     |
| 259.65      | 543.45     |
| 313.66      | 551.24     |
| 366.78      | 656.45     |
| 423.55      | 804        |
| 437.09      | 873.79     |
| 545.46      | 924.26     |
| 553.59      | 1064.4     |
| 555.3       | 1167.09    |
| 660.28      | 1233.11    |
| 821.77      | 1282.71    |
| 877.4       | 1327.63    |
| 928.66      | 1338.87    |
| 1059.34     | 1407.33    |
| 1164.8      | 1452.13    |
| 1230.33     | 3061.03    |
| 1285.25     | 3166.69    |
| 1326.09     |            |
| 1337.47     |            |
| 1415.52     |            |
| 1456.79     |            |
| 3058.16     |            |
| 3149.6      |            |

**Table S3:** Vibrational frequencies of the reactants, pre-reactive complexes, transition states, product complexes, and products for the reaction calculated at the **MP2/cc-pVTZ level of theory**. All the frequency values are in  $\text{cm}^{-1}$ .

| Reactant | OH      | CR1A    | TS1A     | PC1A    | P1A     | H2O     | CR2A    | TS2A     |
|----------|---------|---------|----------|---------|---------|---------|---------|----------|
| 24.93    | 3819.13 | 16.94   | -2144.37 | 35.97   | 35.97   | 1652.08 | 18.53   | -2211.71 |
| 120.2    |         | 46.88   | 22.94    | 48.55   | 48.55   | 3855.52 | 39.55   | 32.06    |
| 141.77   |         | 56.52   | 74.05    | 141.74  | 141.74  | 3975.84 | 57.29   | 71.06    |
| 230.54   |         | 93.13   | 91.28    | 217.54  | 217.54  |         | 95.54   | 86.06    |
| 240.29   |         | 101.6   | 132.27   | 227.12  | 227.12  |         | 110.6   | 133.19   |
| 304.58   |         | 135.81  | 151.67   | 311.68  | 311.68  |         | 138.14  | 143.2    |
| 329.4    |         | 149.43  | 163.4    | 330.85  | 330.85  |         | 145.46  | 163.28   |
| 385.13   |         | 231.8   | 230.77   | 335.62  | 335.62  |         | 231.07  | 229.66   |
| 409.07   |         | 241.45  | 233.43   | 389.79  | 389.79  |         | 241.03  | 243.94   |
| 468.78   |         | 296.22  | 306.13   | 462.6   | 462.6   |         | 291.24  | 304.98   |
| 539.03   |         | 306.78  | 326.48   | 494.87  | 494.87  |         | 305.56  | 325.39   |
| 550.24   |         | 330.58  | 341.55   | 545.14  | 545.14  |         | 330.1   | 354.95   |
| 655.79   |         | 386.53  | 395.15   | 610.36  | 610.36  |         | 386.91  | 391.98   |
| 706.63   |         | 413.68  | 469.42   | 659.15  | 659.15  |         | 416.18  | 470.82   |
| 839.21   |         | 470.22  | 540.51   | 778.43  | 778.43  |         | 468.89  | 532.56   |
| 890.83   |         | 538.96  | 546.29   | 831.67  | 831.67  |         | 539.39  | 549.84   |
| 930.93   |         | 550.72  | 656.72   | 881.57  | 881.57  |         | 550.42  | 656.56   |
| 1029.06  |         | 655.68  | 693.8    | 1017.01 | 1017.01 |         | 655.97  | 675.06   |
| 1177.02  |         | 708.41  | 778.02   | 1189.4  | 1189.4  |         | 702.28  | 760.91   |
| 1193.54  |         | 840.12  | 835.16   | 1208.65 | 1208.65 |         | 839.45  | 808.68   |
| 1223.37  |         | 887.16  | 870.92   | 1235.51 | 1235.51 |         | 889.25  | 846.81   |
| 1306.74  |         | 934.41  | 889.07   | 1291.57 | 1291.57 |         | 933.93  | 909.13   |
| 1339.23  |         | 1019.23 | 976.46   | 1435.4  | 1435.4  |         | 1030.92 | 977.35   |
| 1410.88  |         | 1175.67 | 1030.13  | 3312.24 | 3312.24 |         | 1174.3  | 1051.14  |
| 1460.4   |         | 1200.89 | 1110.35  |         |         |         | 1198.97 | 1131.82  |
| 3132.85  |         | 1214.34 | 1198.2   |         |         |         | 1222.23 | 1170.21  |
| 3202.72  |         | 1299.48 | 1213.89  |         |         |         | 1303.8  | 1207.22  |
|          |         | 1341.33 | 1252.86  |         |         |         | 1341    | 1258.63  |
|          |         | 1417.75 | 1302.01  |         |         |         | 1418.45 | 1295.01  |
|          |         | 1461.63 | 1397.28  |         |         |         | 1465.23 | 1393.79  |
|          |         | 3135.08 | 1468.52  |         |         |         | 3130.79 | 1459.89  |
|          |         | 3204.77 | 3197.04  |         |         |         | 3201.43 | 3177.08  |
|          |         | 3801.99 | 3785.42  |         |         |         | 3799.05 | 3788.5   |

| PC2A    | P2A     | CR3A    | TS3A    | PC3A    | P3A     | HOCI    | CR4A    | TS4A    |
|---------|---------|---------|---------|---------|---------|---------|---------|---------|
| 23.14   | 25.56   | 14.23   | -592.25 | 19.94   | 30.96   | 769.36  | 13.61   | -531.03 |
| 39      | 58.73   | 15.98   | 23.19   | 26.84   | 102.46  | 1278.29 | 33.05   | 25.88   |
| 49.57   | 142.32  | 25.53   | 64.91   | 33.51   | 140.07  | 3801.89 | 46.8    | 64.29   |
| 61.1    | 224.34  | 64.42   | 92.94   | 39.97   | 264.11  |         | 85.65   | 85.11   |
| 86.22   | 239.61  | 65.05   | 116.76  | 56.43   | 305.8   |         | 118.61  | 123.3   |
| 112.61  | 298.11  | 120.82  | 140.07  | 75.28   | 394.95  |         | 143     | 150.11  |
| 150.04  | 319.85  | 135.78  | 185.99  | 78.94   | 419.91  |         | 209.41  | 169.24  |
| 214.71  | 330.84  | 153.51  | 217.33  | 103.02  | 502.66  |         | 230.3   | 219.39  |
| 227.95  | 391.88  | 234.06  | 240.89  | 141.78  | 543.33  |         | 233.17  | 239.29  |
| 243.86  | 466.5   | 240.66  | 298.91  | 265.21  | 548.7   |         | 255     | 293.53  |
| 249.93  | 517.31  | 304.71  | 306.38  | 306.9   | 679.22  |         | 305.03  | 310.36  |
| 301.23  | 542.97  | 330.57  | 348.77  | 396.73  | 740.44  |         | 330.05  | 341.94  |
| 326.36  | 637.74  | 385.44  | 405.5   | 422.84  | 853.09  |         | 386.2   | 382.19  |
| 379.31  | 666.34  | 409.07  | 448.41  | 509.07  | 928.64  |         | 408.21  | 444.87  |
| 408.06  | 746.9   | 469.9   | 541.87  | 543.7   | 1060.72 |         | 469.6   | 545.65  |
| 466.62  | 852.03  | 538.96  | 547.8   | 550.15  | 1182.07 |         | 539.53  | 546.33  |
| 535.25  | 886.99  | 550.24  | 633.01  | 683.17  | 1212.72 |         | 551.39  | 653.71  |
| 542.86  | 1024.8  | 656.39  | 704.98  | 741.35  | 1271.22 |         | 656.07  | 691.18  |
| 655.62  | 1174.82 | 705.63  | 754.16  | 799.41  | 1310.69 |         | 706.18  | 812.22  |
| 667.17  | 1201.39 | 841.67  | 862.24  | 854.22  | 1343.36 |         | 840.51  | 864.71  |
| 748.2   | 1226.48 | 891.31  | 928.26  | 928.53  | 1390.43 |         | 894.13  | 931.67  |
| 850.42  | 1319.75 | 931.7   | 1049.88 | 1061.21 | 1458    |         | 924.51  | 1036.43 |
| 885.33  | 1430.05 | 1027.71 | 1161.6  | 1183.53 | 3126.15 |         | 1027.16 | 1161.23 |
| 1024.94 | 3299.45 | 1176.3  | 1182.83 | 1213.79 | 3195.68 |         | 1170.34 | 1179.64 |
| 1156.74 |         | 1193.32 | 1202.67 | 1271.09 |         |         | 1202.92 | 1201.84 |
| 1189.63 |         | 1221.77 | 1255.15 | 1274.7  |         |         | 1214.58 | 1252.95 |
| 1229.33 |         | 1306.75 | 1302.6  | 1309.6  |         |         | 1304.23 | 1303.17 |
| 1324.98 |         | 1338.85 | 1336.82 | 1342.03 |         |         | 1332.8  | 1327.1  |
| 1434.35 |         | 1411.61 | 1397.3  | 1390.85 |         |         | 1411.99 | 1408.55 |
| 1654.65 |         | 1460.17 | 1455.7  | 1455.22 |         |         | 1460.92 | 1457.94 |
| 3284.21 |         | 3132.55 | 3131.76 | 3127.11 |         |         | 3132.93 | 3110.63 |
| 3838.08 |         | 3202.14 | 3201.27 | 3195.76 |         |         | 3202.97 | 3189.42 |
| 3953.38 |         | 3811.2  | 3814.94 | 3798.07 |         |         | 3812.9  | 3815.29 |



| <b>PC4A</b> | <b>P4A</b> | <b>HCI</b> | <b>CR1B</b> | <b>TS1B</b> | <b>PC1B</b> | <b>P1B</b> | <b>CR2B</b> | <b>TS2B</b> |
|-------------|------------|------------|-------------|-------------|-------------|------------|-------------|-------------|
|             |            |            |             |             |             |            |             |             |
| 22.8        | 30.4       | 3054.58    | 18.4        | -1326.04    | 15.02       | 36.04      | 19.62       | -1271.28    |
| 33.99       | 89.9       |            | 27.27       | 19.73       | 25.77       | 48.58      | 26.79       | 24.99       |
| 35.38       | 143.35     |            | 36.28       | 49.81       | 45.03       | 141.74     | 46.16       | 51.31       |
| 41.28       | 262.64     |            | 51.8        | 77.24       | 55.78       | 217.54     | 51.74       | 70.12       |
| 62.05       | 310.43     |            | 121.96      | 118.23      | 76          | 227.14     | 126.41      | 111.88      |
| 108.62      | 364.45     |            | 141.41      | 150.77      | 138.55      | 311.68     | 142         | 141.32      |
| 118.52      | 435.31     |            | 231.25      | 215.03      | 152.74      | 330.86     | 230.85      | 226.15      |
| 143.63      | 439.46     |            | 241.01      | 228.11      | 210.24      | 335.59     | 240.31      | 240.77      |
| 262.23      | 545.26     |            | 304.69      | 299.11      | 219.86      | 389.78     | 304.91      | 300.64      |
| 292.76      | 552.42     |            | 328.94      | 314.47      | 232.3       | 462.6      | 329.42      | 311.97      |
| 311.77      | 659.15     |            | 384.53      | 329.05      | 311.89      | 494.82     | 386.07      | 350.24      |
| 368.32      | 817.3      |            | 409.16      | 392.5       | 332.05      | 545.14     | 411.16      | 390.21      |
| 438.76      | 865.09     |            | 467.41      | 469.09      | 335.37      | 610.31     | 468.43      | 463.52      |
| 439.06      | 921.57     |            | 539.08      | 502.76      | 389.08      | 659.14     | 538.64      | 490         |
| 547.91      | 1058.59    |            | 550.19      | 545.44      | 463.04      | 778.42     | 550.09      | 537.24      |
| 553.27      | 1165.48    |            | 654.91      | 551.79      | 492.42      | 831.65     | 655.87      | 553.08      |
| 658.81      | 1214.63    |            | 707.1       | 658.14      | 545.18      | 881.57     | 700.67      | 662.49      |
| 767.65      | 1266.85    |            | 834.6       | 732.76      | 607.4       | 1017       | 840.28      | 702.29      |
| 822.01      | 1316.83    |            | 889.64      | 845.17      | 658.74      | 1189.32    | 889.87      | 822.16      |
| 859.5       | 1332.32    |            | 930.02      | 851.59      | 775.92      | 1208.66    | 931.98      | 850.78      |
| 923.78      | 1408.32    |            | 1029.91     | 874.32      | 834.69      | 1235.51    | 1028.03     | 859.55      |
| 1059.72     | 1460       |            | 1178.48     | 926.71      | 879.01      | 1291.55    | 1175.54     | 917.81      |
| 1156.13     | 3090.29    |            | 1195.72     | 1008.12     | 1015.81     | 1435.4     | 1195.21     | 1058.85     |
| 1214.2      | 3194.24    |            | 1224.9      | 1097.4      | 1163.29     | 3312.31    | 1224.33     | 1103.72     |
| 1254.03     |            |            | 1307.13     | 1206.15     | 1215.35     |            | 1306.03     | 1165.61     |
| 1293.22     |            |            | 1340.55     | 1219.18     | 1232.25     |            | 1339.27     | 1204.52     |
| 1314.29     |            |            | 1411.62     | 1230.06     | 1291.08     |            | 1412.6      | 1241.61     |
| 1332.82     |            |            | 1461.13     | 1307.36     | 1437.84     |            | 1460.91     | 1300.82     |
| 1414.5      |            |            | 3132.24     | 1392.77     | 3034.28     |            | 3132.48     | 1392        |
| 1464.46     |            |            | 3202.35     | 3221.95     | 3316.96     |            | 3203.3      | 3207.56     |
| 3085.97     |            |            |             |             |             |            |             |             |
| 3192.94     |            |            |             |             |             |            |             |             |
| 3776.23     |            |            |             |             |             |            |             |             |

| <b>PC2B</b> | <b>P2B</b> | <b>CR3B</b> | <b>TS3B</b> | <b>PC3B</b> | <b>P3B</b> | <b>Cl<sub>2</sub></b> |
|-------------|------------|-------------|-------------|-------------|------------|-----------------------|
| 17.73       | 25.54      | 18.39       | -438.26     | 20.65       | 30.94      | 577.97                |
| 26.31       | 58.75      | 27.24       | 25.62       | 24.12       | 102.46     |                       |
| 40.91       | 142.33     | 36.27       | 49.69       | 37.06       | 140.07     |                       |
| 68.98       | 224.34     | 51.82       | 64.18       | 50.02       | 264.11     |                       |
| 77.44       | 239.6      | 121.99      | 109.19      | 69.23       | 305.8      |                       |
| 145.14      | 298.11     | 141.43      | 124.47      | 73.66       | 394.95     |                       |
| 167.92      | 319.87     | 231.25      | 153.79      | 103.36      | 419.91     |                       |
| 224.98      | 330.86     | 241         | 189.46      | 142.33      | 502.68     |                       |
| 239.37      | 391.88     | 304.69      | 257.07      | 265.41      | 543.33     |                       |
| 271.17      | 466.5      | 328.94      | 276.67      | 307.09      | 548.7      |                       |
| 299.4       | 517.33     | 384.52      | 316.84      | 396.86      | 679.24     |                       |
| 324.94      | 542.98     | 409.17      | 403.62      | 423.4       | 740.44     |                       |
| 338.73      | 637.78     | 467.41      | 445.79      | 510.68      | 853.1      |                       |
| 391.59      | 666.34     | 539.08      | 538.15      | 543.8       | 928.65     |                       |
| 465.56      | 746.91     | 550.19      | 546.62      | 550.45      | 1060.73    |                       |
| 518.62      | 852.02     | 654.9       | 572.5       | 565.13      | 1182.08    |                       |
| 542.49      | 886.98     | 707.11      | 696.88      | 684.59      | 1212.71    |                       |
| 638.3       | 1024.79    | 834.6       | 744.77      | 741.81      | 1271.23    |                       |
| 667.92      | 1174.82    | 889.63      | 861.57      | 854.65      | 1310.7     |                       |
| 737.55      | 1201.4     | 930.04      | 932.73      | 929.2       | 1343.36    |                       |
| 853.38      | 1226.5     | 1029.9      | 1062.4      | 1062.74     | 1390.42    |                       |
| 884.34      | 1319.75    | 1178.48     | 1190.14     | 1184.18     | 1458       |                       |
| 1027.15     | 1430.05    | 1195.72     | 1211.35     | 1214.52     | 3126.15    |                       |
| 1175.44     | 3299.43    | 1224.9      | 1273.88     | 1272.53     | 3195.68    |                       |
| 1206.63     |            | 1307.12     | 1302.99     | 1309.24     |            |                       |
| 1230.36     |            | 1340.56     | 1339.72     | 1342.8      |            |                       |
| 1317.27     |            | 1411.62     | 1387.03     | 1389.56     |            |                       |
| 1430.92     |            | 1461.13     | 1455.66     | 1455.31     |            |                       |
| 2995.54     |            | 3132.24     | 3136.47     | 3125.91     |            |                       |
| 3300.5      |            | 3202.35     | 3207.27     | 3195.15     |            |                       |

| <b>CR4B</b> | <b>TS4B</b> | <b>PC4B</b> | <b>P4B</b> |
|-------------|-------------|-------------|------------|
|             |             |             |            |
| 10.66       | -438.95     | 11.19       | 31.17      |
| 16.41       | 30.37       | 20.31       | 80.62      |
| 31.53       | 44.43       | 33.43       | 140.9      |
| 47.05       | 69.88       | 38.21       | 262.38     |
| 119.66      | 105.46      | 42.35       | 311.33     |
| 142.14      | 142.73      | 48.32       | 362.71     |
| 230.87      | 158.56      | 92.08       | 416.81     |
| 240.8       | 188.93      | 144.24      | 438.07     |
| 304.67      | 267.3       | 262.56      | 543.45     |
| 329.43      | 272.2       | 310.42      | 551.24     |
| 385.54      | 318.45      | 365.07      | 656.45     |
| 408.58      | 369.71      | 438.78      | 804        |
| 468.96      | 446.84      | 441.52      | 873.79     |
| 539.23      | 511.21      | 545.6       | 924.26     |
| 550.42      | 545.75      | 552.97      | 1064.4     |
| 655.29      | 563.9       | 570.12      | 1167.09    |
| 705.18      | 663.81      | 659.79      | 1233.11    |
| 839.67      | 820.15      | 821.86      | 1282.71    |
| 891.33      | 866.71      | 865.74      | 1327.63    |
| 928.19      | 930.02      | 922.28      | 1338.87    |
| 1027.37     | 1049.06     | 1058.49     | 1407.33    |
| 1173.76     | 1164.57     | 1165.34     | 1452.13    |
| 1197.22     | 1206.07     | 1214.98     | 3061.03    |
| 1218.02     | 1278.52     | 1266.76     | 3166.69    |
| 1304.19     | 1306.76     | 1315.67     |            |
| 1333.46     | 1330.95     | 1331.42     |            |
| 1410.77     | 1409.22     | 1408.51     |            |
| 1460.44     | 1455.45     | 1459.25     |            |
| 3132.8      | 3102.33     | 3088.3      |            |
| 3202.86     | 3187.24     | 3192.91     |            |

**Table S4:** The corrected zero-point energies (EE+ZPE), enthalpies (H), and Gibbs free energies (G) of all the species calculated at the **M06-2X/cc-pVTZ level of theory**. All energies are in Hartree.

| Reaction Pathway | Species                                           | EE+ZPE     | H          | G          |
|------------------|---------------------------------------------------|------------|------------|------------|
| Reactants        | CF <sub>3</sub> CH <sub>2</sub> CFCl <sub>2</sub> | -1435.2925 | -1435.2829 | -1435.3279 |
|                  | OH                                                | -75.7219   | -75.7186   | -75.7388   |
| R1A              | CR1A                                              | -1511.0210 | -1511.0083 | -1511.0614 |
|                  | TS1A                                              | -1511.0100 | -1510.9980 | -1511.0498 |
|                  | PC1A                                              | -1511.0457 | -1511.0320 | -1511.0876 |
|                  | P1A                                               | -1434.6345 | -1434.6245 | -1434.6718 |
|                  | H <sub>2</sub> O                                  | -76.4037   | -76.3999   | -76.4220   |
|                  |                                                   |            |            |            |
| R2A              | CR2A                                              | -1511.0213 | -1511.0087 | -1511.0612 |
|                  | TS2A                                              | -1511.0093 | -1510.9973 | -1511.0485 |
|                  | PC2A                                              | -1511.0447 | -1511.0309 | -1511.0870 |
|                  | P2A                                               | -1434.6329 | -1434.6230 | -1434.6699 |
|                  |                                                   |            |            |            |
| R3A              | CR3A                                              | -1511.0211 | -1511.0083 | -1511.0615 |
|                  | TS3A                                              | -1510.9779 | -1510.9655 | -1511.0190 |
|                  | PC3A                                              | -1510.9853 | -1510.9718 | -1511.0298 |
|                  | P3A                                               | -975.0301  | -975.0215  | -975.0650  |
|                  | HOCl                                              | -535.9508  | -535.9470  | -535.9737  |
|                  |                                                   |            |            |            |
| R4A              | CR4A                                              | -1511.0210 | -1511.0084 | -1511.0612 |
|                  | TS4A                                              | -1510.9757 | -1510.9634 | -1511.0160 |
|                  | PC4A                                              | -1510.9840 | -1510.9713 | -1511.0271 |
|                  | P4A                                               | -975.0299  | -975.0212  | -975.0650  |
|                  |                                                   |            |            |            |
| R1B              | Cl                                                | -460.1407  | -460.1383  | -460.1564  |
|                  | CR1B                                              | -1895.4391 | -1895.4271 | -1895.4807 |
|                  | TS1B                                              | -1895.4239 | -1895.4122 | -1895.4642 |
|                  | PC1B                                              | -1895.4366 | -1895.4232 | -1895.4800 |
|                  | P1B                                               | -1434.6330 | -1434.6230 | -1434.6700 |
|                  | HCl                                               | -460.7997  | -460.7964  | -460.8175  |
|                  |                                                   |            |            |            |
| R2B              | CR2B                                              | -1895.4393 | -1895.4274 | -1895.4798 |
|                  | TS2B                                              | -1895.4214 | -1895.4097 | -1895.4615 |
|                  | PC2B                                              | -1895.4364 | -1895.4231 | -1895.4786 |
|                  | P2B                                               | -1434.6329 | -1434.6230 | -1434.6699 |
|                  |                                                   |            |            |            |
| R3B              | CR3B                                              | -1895.4390 | -1895.4270 | -1895.4270 |
|                  | TS3B                                              | -1895.4053 | -1895.3923 | -1895.4469 |
|                  | PC3B                                              | -1895.4074 | -1895.3945 | -1895.4518 |
|                  | P3B                                               | -975.0301  | -975.0215  | -975.0650  |
|                  | Cl <sub>2</sub>                                   | -920.3730  | -920.3695  | -920.3947  |
|                  |                                                   |            |            |            |
| R4B              | CR4B                                              | -1895.4393 | -1895.4274 | -1895.4797 |
|                  | TS4B                                              | -1895.4022 | -1895.3902 | -1895.4432 |
|                  | PC4B                                              | -1895.4059 | -1895.3930 | -1895.4504 |
|                  | P4B                                               | -975.0299  | -975.0212  | -975.0649  |

**Table S5:** The corrected zero-point energies (EE+ZPE), enthalpies (H), and Gibbs free energies (G) of all the species calculated at the **MP2/cc-pVTZ level of theory**. All energies are in Hartree.

| Reaction Pathway | Species                                             | EE+ZPE     | H          | G          |
|------------------|-----------------------------------------------------|------------|------------|------------|
| Reactants        | <b>CF<sub>3</sub>CH<sub>2</sub>CFCl<sub>2</sub></b> | -1433.5659 | -1433.5563 | -1433.6016 |
|                  | <b>OH</b>                                           | -75.6102   | -75.6069   | -75.6271   |
| R1A              | <b>CR1A</b>                                         | -1509.1814 | -1509.1683 | -1509.2234 |
|                  | <b>TS1A</b>                                         | -1509.1663 | -1509.1544 | -1509.2058 |
|                  | <b>PC1A</b>                                         | -1509.2078 | -1509.1939 | -1509.2503 |
|                  | <b>P1A</b>                                          | -1432.9047 | -1432.8948 | -1432.9416 |
|                  | <b>H<sub>2</sub>O</b>                               | -76.2970   | -76.2932   | -76.3153   |
|                  |                                                     |            |            |            |
| R2A              | <b>CR2A</b>                                         | -1509.1812 | -1509.1680 | -1509.2231 |
|                  | <b>TS2A</b>                                         | -1509.1656 | -1509.1537 | -1509.2049 |
|                  | <b>PC2A</b>                                         | -1509.2073 | -1509.1934 | -1509.2505 |
|                  | <b>P2A</b>                                          | -1432.9033 | -1432.8933 | -1432.9402 |
|                  |                                                     |            |            |            |
| R3A              | <b>CR3A</b>                                         | -1509.1779 | -1509.1642 | -1509.223  |
|                  | <b>TS3A</b>                                         | -1509.1251 | -1509.1132 | -1509.1649 |
|                  | <b>PC3A</b>                                         | -1509.1411 | -1509.1274 | -1509.1868 |
|                  | <b>P3A</b>                                          | -973.7935  | -973.7849  | -973.8282  |
|                  | <b>HOCl</b>                                         | -535.3442  | -535.3404  | -535.3672  |
|                  |                                                     |            |            |            |
| R4A              | <b>CR4A</b>                                         | -1509.1787 | -1509.1656 | -1509.2213 |
|                  | <b>TS4A</b>                                         | -1509.1235 | -1509.1115 | -1509.1632 |
|                  | <b>PC4A</b>                                         | -1509.1440 | -1509.1307 | -1509.1880 |
|                  | <b>P4A</b>                                          | -973.7936  | -973.7849  | -973.8285  |
|                  |                                                     |            |            |            |
| R1B              | <b>Cl</b>                                           | -459.6433  | -459.6410  | -459.6590  |
|                  | <b>CR1B</b>                                         | -1893.2119 | -1893.1997 | -1893.2546 |
|                  | <b>TS1B</b>                                         | -1893.1960 | -1893.1843 | -1893.2361 |
|                  | <b>PC1B</b>                                         | -1893.2102 | -1893.1966 | -1893.2545 |
|                  | <b>P1B</b>                                          | -1432.9047 | -1432.8948 | -1432.9416 |
|                  | <b>HCl</b>                                          | -460.3024  | -460.2991  | -460.3203  |
|                  |                                                     |            |            |            |
| R2B              | <b>CR2B</b>                                         | -1893.2120 | -1893.1999 | -1893.2544 |
|                  | <b>TS2B</b>                                         | -1893.1938 | -1893.1822 | -1893.2338 |
|                  | <b>PC2B</b>                                         | -1893.2090 | -1893.1955 | -1893.2526 |
|                  | <b>P2B</b>                                          | -1432.9033 | -1432.8933 | -1432.9402 |
|                  |                                                     |            |            |            |
| R3B              | <b>CR3B</b>                                         | -1893.2119 | -1893.1997 | -1893.2546 |
|                  | <b>TS3B</b>                                         | -1893.1663 | -1893.1545 | -1893.2072 |
|                  | <b>PC3B</b>                                         | -1893.1723 | -1893.1594 | -1893.2170 |
|                  | <b>P3B</b>                                          | -973.7935  | -973.7849  | -973.8282  |
|                  | <b>Cl<sub>2</sub></b>                               | -919.3754  | -919.3719  | -919.3972  |
|                  |                                                     |            |            |            |
| R4B              | <b>CR4B</b>                                         | -1893.2110 | -1893.1987 | -1893.2549 |
|                  | <b>TS4B</b>                                         | -1893.1633 | -1893.1515 | -1893.2039 |
|                  | <b>PC4B</b>                                         | -1893.1715 | -1893.1584 | -1893.2182 |
|                  | <b>P4B</b>                                          | -973.7935  | -973.7849  | -973.8285  |

**Table S6:** Intrinsic reaction coordinate (IRC) data for the reaction of DTP with OH-radical calculated at the **MP2/cc-pVTZ level of theory (R1A)**.

| <b>Coordinates</b> | <b>Energy (Hartree)</b> | <b>Relative Energy (Hartree)</b> | <b>Relative Energy (kcal/mol)</b> |
|--------------------|-------------------------|----------------------------------|-----------------------------------|
| -2.07362           | -1509.2589              | -0.0193                          | -12.1672                          |
| -1.96971           | -1509.2584              | -0.0188                          | -11.8409                          |
| -1.86589           | -1509.2578              | -0.0183                          | -11.5020                          |
| -1.76207           | -1509.2573              | -0.0177                          | -11.1506                          |
| -1.65842           | -1509.2567              | -0.0171                          | -10.7867                          |
| -1.5548            | -1509.2561              | -0.0165                          | -10.4102                          |
| -1.45126           | -1509.2555              | -0.0159                          | -10.0023                          |
| -1.34757           | -1509.2548              | -0.0152                          | -9.5693                           |
| -1.24378           | -1509.2540              | -0.0145                          | -9.1050                           |
| -1.13991           | -1509.2532              | -0.0136                          | -8.5904                           |
| -1.03600           | -1509.2523              | -0.0127                          | -8.0257                           |
| -0.93207           | -1509.2513              | -0.0117                          | -7.3919                           |
| -0.82815           | -1509.2501              | -0.0106                          | -6.6703                           |
| -0.72423           | -1509.2488              | -0.0093                          | -5.8483                           |
| -0.62038           | -1509.2473              | -0.0078                          | -4.9070                           |
| -0.51885           | -1509.2455              | -0.0059                          | -3.7273                           |
| -0.41593           | -1509.2423              | -0.0027                          | -1.7193                           |
| -0.31202           | -1509.2375              | 0.0020                           | 1.2801                            |
| -0.20802           | -1509.2321              | 0.0073                           | 4.6309                            |
| -0.10401           | -1509.2283              | 0.0112                           | 7.0656                            |
| 0                  | -1509.2271              | 0.0124                           | 7.7998                            |
| 0.10366            | -1509.2278              | 0.0117                           | 7.3794                            |
| 0.20534            | -1509.2289              | 0.0106                           | 6.6828                            |
| 0.30907            | -1509.2298              | 0.0097                           | 6.0867                            |
| 0.41298            | -1509.2307              | 0.0088                           | 5.5220                            |
| 0.51698            | -1509.2316              | 0.0079                           | 4.9823                            |
| 0.62085            | -1509.2324              | 0.0071                           | 4.4615                            |
| 0.72431            | -1509.2332              | 0.0063                           | 3.9720                            |
| 0.82694            | -1509.2339              | 0.0056                           | 3.5140                            |
| 0.92956            | -1509.2346              | 0.0049                           | 3.1061                            |
| 1.03327            | -1509.2352              | 0.0043                           | 2.7108                            |
| 1.13721            | -1509.2358              | 0.00373                          | 2.3405                            |
| 1.24118            | -1509.2363              | 0.00319                          | 2.0017                            |
| 1.34517            | -1509.2368              | 0.00268                          | 1.6817                            |
| 1.44916            | -1509.2373              | 0.00222                          | 1.3930                            |
| 1.55314            | -1509.2377              | 0.00178                          | 1.1169                            |
| 1.65712            | -1509.2381              | 0.00138                          | 0.8659                            |
| 1.76111            | -1509.2385              | 0.00100                          | 0.6275                            |
| 1.86509            | -1509.2389              | 0.00065                          | 0.4078                            |
| 1.96908            | -1509.2392              | 0.00031                          | 0.1945                            |
| 2.07306            | -1509.2395              | 0                                | 0.0000                            |

**Table S7:** Intrinsic reaction coordinate (IRC) data for the reaction of DTP with OH-radical calculated at the **MP2/cc-pVTZ level of theory (R2A)**.

| <b>Coordinates</b> | <b>Energy (Hartree)</b> | <b>Relative Energy (Hartree)</b> | <b>Relative Energy (kcal/mol)</b> |
|--------------------|-------------------------|----------------------------------|-----------------------------------|
| -2.07002           | -1509.2555              | -0.0163                          | -10.2408                          |
| -1.96626           | -1509.2550              | -0.0158                          | -9.9270                           |
| -1.86251           | -1509.2545              | -0.0153                          | -9.6070                           |
| -1.75876           | -1509.2540              | -0.0147                          | -9.2681                           |
| -1.65509           | -1509.2534              | -0.0142                          | -8.9167                           |
| -1.55155           | -1509.2528              | -0.0136                          | -8.5528                           |
| -1.44824           | -1509.2522              | -0.0130                          | -8.1700                           |
| -1.34496           | -1509.2516              | -0.0123                          | -7.7684                           |
| -1.24150           | -1509.2509              | -0.0116                          | -7.3292                           |
| -1.13789           | -1509.2501              | -0.0109                          | -6.8585                           |
| -1.03420           | -1509.2493              | -0.0101                          | -6.3377                           |
| -0.93050           | -1509.2484              | -0.0091                          | -5.7667                           |
| -0.82679           | -1509.2473              | -0.0081                          | -5.1141                           |
| -0.72308           | -1509.2462              | -0.0069                          | -4.3736                           |
| -0.61940           | -1509.2448              | -0.0055                          | -3.5077                           |
| -0.51694           | -1509.2431              | -0.0039                          | -2.4723                           |
| -0.41503           | -1509.2405              | -0.0012                          | -0.8094                           |
| -0.31141           | -1509.2363              | 0.0029                           | 1.8385                            |
| -0.20762           | -1509.2313              | 0.0079                           | 4.9760                            |
| -0.10382           | -1509.2274              | 0.0117                           | 7.3856                            |
| 0                  | -1509.2262              | 0.0129                           | 8.1449                            |
| 0.10356            | -1509.2269              | 0.0122                           | 7.6868                            |
| 0.20524            | -1509.2281              | 0.0110                           | 6.9338                            |
| 0.30845            | -1509.2291              | 0.0100                           | 6.3126                            |
| 0.41222            | -1509.2300              | 0.0091                           | 5.7416                            |
| 0.51594            | -1509.2309              | 0.0082                           | 5.1894                            |
| 0.61960            | -1509.2317              | 0.0074                           | 4.6686                            |
| 0.72275            | -1509.2325              | 0.0066                           | 4.1666                            |
| 0.82536            | -1509.2333              | 0.0059                           | 3.7022                            |
| 0.92832            | -1509.2340              | 0.0052                           | 3.2692                            |
| 1.03183            | -1509.2346              | 0.0045                           | 2.8614                            |
| 1.13553            | -1509.2352              | 0.0039                           | 2.4786                            |
| 1.23931            | -1509.2358              | 0.0033                           | 2.1209                            |
| 1.34310            | -1509.2363              | 0.0028                           | 1.7883                            |
| 1.44691            | -1509.2368              | 0.0023                           | 1.4746                            |
| 1.55071            | -1509.2373              | 0.0018                           | 1.1859                            |
| 1.65451            | -1509.2377              | 0.0014                           | 0.9161                            |
| 1.75831            | -1509.2381              | 0.0010                           | 0.6651                            |
| 1.86211            | -1509.2385              | 0.0006                           | 0.4329                            |
| 1.96591            | -1509.2389              | 0.0003                           | 0.2070                            |
| 2.06972            | -1509.2392              | 0.0000                           | 0.0000                            |

**Table S8:** Intrinsic reaction coordinate (IRC) data for the abstraction of Cl-atom of DTP by OH-radical calculated at the MP2/cc-pVTZ level of theory (R3A).

| Coordinates | Energy (Hartree) | Relative energy (Hartree) | Relative energy (kcal/mol) |
|-------------|------------------|---------------------------|----------------------------|
| -7.07136    | -1509.2067       | 0.000                     | 0.0000                     |
| -6.88454    | -1509.2066       | 0.0002                    | 0.1568                     |
| -6.47844    | -1509.2063       | 0.0005                    | 0.3514                     |
| -6.06984    | -1509.2060       | 0.0009                    | 0.6149                     |
| -5.66289    | -1509.2056       | 0.0015                    | 0.9412                     |
| -5.25534    | -1509.2051       | 0.0021                    | 1.3491                     |
| -4.84726    | -1509.2045       | 0.0029                    | 1.8574                     |
| -4.43896    | -1509.2039       | 0.0039                    | 2.4660                     |
| -4.02844    | -1509.2031       | 0.0064                    | 4.0724                     |
| -3.61786    | -1509.2023       | 0.0082                    | 5.1831                     |
| -3.22076    | -1509.2017       | 0.0104                    | 6.5385                     |
| -2.83481    | -1509.2007       | 0.0130                    | 8.2139                     |
| -2.44527    | -1509.1996       | 0.0164                    | 10.3161                    |
| -2.04159    | -1509.1983       | 0.0205                    | 12.9139                    |
| -1.63318    | -1509.1970       | 0.0255                    | 16.0389                    |
| -1.22209    | -1509.1957       | 0.0312                    | 19.6156                    |
| -0.81514    | -1509.1941       | 0.0374                    | 23.4998                    |
| -0.40347    | -1509.1928       | 0.0435                    | 27.3025                    |
| 0           | -1509.1919       | 0.0479                    | 30.0886                    |
| 0.41343     | -1509.1934       | 0.0493                    | 30.9796                    |
| 0.82751     | -1509.1978       | 0.0485                    | 30.4651                    |
| 1.24176     | -1509.2039       | 0.0471                    | 29.5929                    |
| 1.65643     | -1509.2100       | 0.0456                    | 28.6391                    |
| 2.07121     | -1509.2157       | 0.0442                    | 27.7794                    |
| 2.48595     | -1509.2207       | 0.0429                    | 26.9574                    |
| 2.90051     | -1509.2249       | 0.0416                    | 26.1479                    |
| 3.31463     | -1509.2282       | 0.0406                    | 25.4953                    |
| 3.72856     | -1509.2309       | 0.0395                    | 24.8301                    |
| 4.1417      | -1509.2330       | 0.0389                    | 24.4662                    |
| 4.55342     | -1509.2348       | 0.0381                    | 23.9579                    |
| 4.96091     | -1509.2362       | 0.0374                    | 23.4998                    |
| 5.37373     | -1509.2374       | 0.0367                    | 23.0731                    |
| 5.78729     | -1509.2383       | 0.0362                    | 22.7343                    |
| 6.20159     | -1509.2392       | 0.0357                    | 22.4268                    |
| 6.6156      | -1509.2398       | 0.0353                    | 22.1695                    |
| 7.02797     | -1509.2403       | 0.0349                    | 21.9499                    |
| 7.43734     | -1509.2407       | 0.0346                    | 21.7617                    |
| 7.84261     | -1509.2411       | 0.0345                    | 21.6989                    |



**Table S9:** Intrinsic reaction coordinate (IRC) data for the abstraction of Cl-atom of DTP by OH-radical calculated at the MP2/cc-pVTZ level of theory (R4A).

| Coordinates | Energy (Hartree) | Relative Energy (Hartree) | Relative Energy (kcal/mol) |
|-------------|------------------|---------------------------|----------------------------|
| -7.42180    | -1509.2405       | 0.0000                    | 0.0000                     |
| -7.05059    | -1509.2401       | 0.0004                    | 0.2572                     |
| -6.67983    | -1509.2396       | 0.0009                    | 0.5710                     |
| -6.30866    | -1509.2390       | 0.0015                    | 0.9600                     |
| -5.93808    | -1509.2383       | 0.0022                    | 1.4181                     |
| -5.57201    | -1509.2374       | 0.0030                    | 1.9327                     |
| -5.20737    | -1509.2364       | 0.0040                    | 2.5602                     |
| -4.83736    | -1509.2352       | 0.0053                    | 3.3383                     |
| -4.46917    | -1509.2337       | 0.0067                    | 4.2544                     |
| -4.09920    | -1509.2320       | 0.0085                    | 5.3588                     |
| -3.72871    | -1509.2299       | 0.0106                    | 6.6954                     |
| -3.35631    | -1509.2273       | 0.0132                    | 8.3081                     |
| -2.98371    | -1509.2241       | 0.0163                    | 10.2784                    |
| -2.61057    | -1509.2203       | 0.0201                    | 12.6629                    |
| -2.23728    | -1509.2158       | 0.0246                    | 15.4867                    |
| -1.86393    | -1509.2107       | 0.0297                    | 18.6932                    |
| -1.49062    | -1509.2052       | 0.0353                    | 22.1821                    |
| -1.11748    | -1509.1995       | 0.0410                    | 25.7400                    |
| -0.74461    | -1509.1944       | 0.0460                    | 28.9152                    |
| -0.37202    | -1509.1912       | 0.0493                    | 30.9545                    |
| 0           | -1509.1903       | 0.0502                    | 31.5444                    |
| 0.36603     | -1509.1908       | 0.0497                    | 31.1930                    |
| 0.73678     | -1509.1919       | 0.0486                    | 30.5153                    |
| 1.10004     | -1509.1932       | 0.0473                    | 29.6870                    |
| 1.45671     | -1509.1943       | 0.0462                    | 29.0156                    |
| 1.82351     | -1509.1954       | 0.0451                    | 28.3002                    |
| 2.19055     | -1509.1964       | 0.0441                    | 27.6790                    |
| 2.56350     | -1509.1974       | 0.0430                    | 27.0327                    |
| 2.93471     | -1509.1984       | 0.0421                    | 26.4491                    |
| 3.30649     | -1509.1992       | 0.0413                    | 25.9283                    |
| 3.67895     | -1509.2000       | 0.0405                    | 25.4451                    |
| 4.05176     | -1509.2007       | 0.0398                    | 25.0058                    |
| 4.4248      | -1509.2013       | 0.0392                    | 24.6105                    |
| 4.79787     | -1509.2019       | 0.0386                    | 24.2466                    |
| 5.16998     | -1509.2024       | 0.0381                    | 23.9140                    |
| 5.53898     | -1509.2029       | 0.0376                    | 23.6191                    |
| 5.90356     | -1509.2033       | 0.0372                    | 23.3618                    |
| 6.25711     | -1509.2036       | 0.0369                    | 23.1798                    |
| 6.62842     | -1509.2039       | 0.0366                    | 22.9790                    |
| 7.00071     | -1509.2042       | 0.0363                    | 22.7845                    |
| 7.37260     | -1509.2045       | 0.03603                   | 22.6088                    |

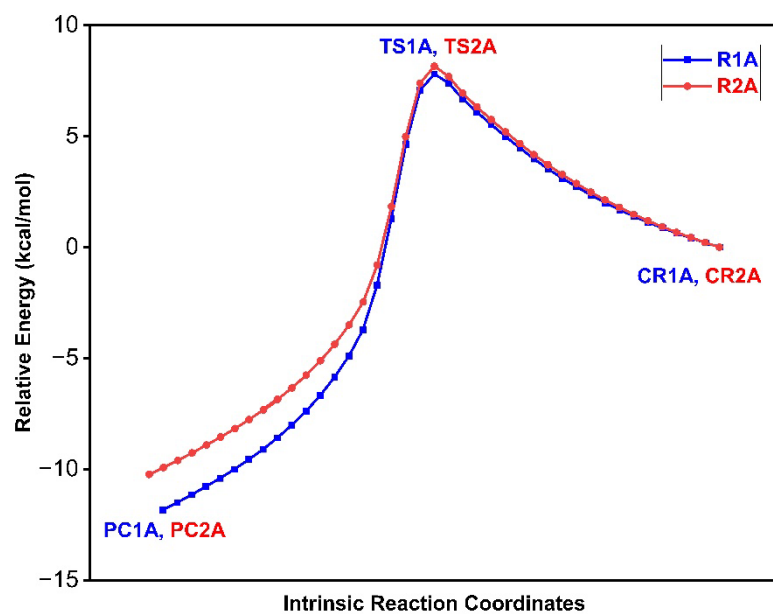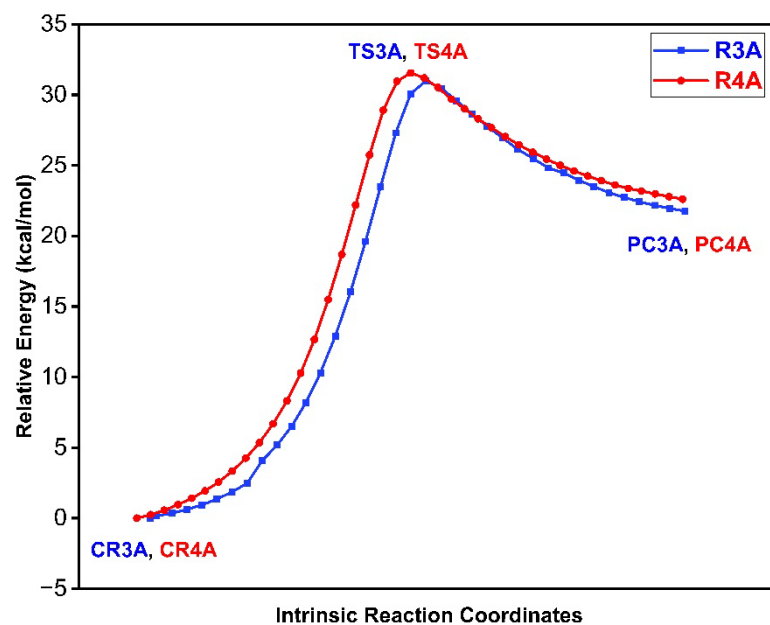

**Figure S3:** Intrinsic reaction coordinate (IRC) plots for R1A-R2A and R3A-R4A at the MP2/cc-pVTZ level of theory.

**Table S10:** Intrinsic reaction coordinate (IRC) data for the abstraction of H-atom of DTP by Cl-atom calculated at the **MP2/cc-pVTZ level of theory (R1B)**.

| Coordinates | Energy (Hartree) | Relative Energy (Hartree) | Relative Energy (kcal/mol) |
|-------------|------------------|---------------------------|----------------------------|
| -2.17647    | -1893.2498       | -0.0063                   | 0.0069                     |
| -2.06740    | -1893.2495       | -0.0061                   | 0.0072                     |
| -1.95834    | -1893.2493       | -0.0058                   | 0.0074                     |
| -1.84929    | -1893.2491       | -0.0056                   | 0.0076                     |
| -1.74029    | -1893.2488       | -0.0053                   | 0.0079                     |
| -1.63139    | -1893.2485       | -0.0051                   | 0.0082                     |
| -1.52249    | -1893.2483       | -0.0048                   | 0.0084                     |
| -1.41359    | -1893.2480       | -0.0045                   | 0.0087                     |
| -1.30460    | -1893.2477       | -0.0042                   | 0.0090                     |
| -1.19557    | -1893.2474       | -0.0039                   | 0.0093                     |
| -1.08651    | -1893.2471       | -0.0036                   | 0.0096                     |
| -0.97745    | -1893.2468       | -0.0033                   | 0.0099                     |
| -0.86838    | -1893.2465       | -0.0030                   | 0.0102                     |
| -0.75933    | -1893.2461       | -0.0027                   | 0.0106                     |
| -0.65030    | -1893.2458       | -0.0023                   | 0.0109                     |
| -0.54131    | -1893.2454       | -0.0020                   | 0.0113                     |
| -0.43237    | -1893.2451       | -0.0016                   | 0.0116                     |
| -0.32360    | -1893.2446       | -0.0012                   | 0.0121                     |
| -0.21484    | -1893.2440       | -0.0007                   | 0.0125                     |
| -0.10819    | -1893.2438       | -0.0002                   | 0.0130                     |
| 0           | -1893.2434       | 0.0000                    | 0.0133                     |
| 0.10899     | -1893.2435       | -0.0004                   | 0.0128                     |
| 0.21803     | -1893.2454       | -0.0020                   | 0.0113                     |
| 0.32706     | -1893.2476       | -0.0041                   | 0.0091                     |
| 0.43579     | -1893.2496       | -0.0061                   | 0.0071                     |
| 0.53719     | -1893.2505       | -0.0071                   | 0.0062                     |
| 0.64521     | -1893.2511       | -0.0076                   | 0.0056                     |
| 0.75363     | -1893.2516       | -0.0082                   | 0.0051                     |
| 0.86242     | -1893.2521       | -0.0087                   | 0.0046                     |
| 0.97132     | -1893.2526       | -0.0091                   | 0.0041                     |
| 1.08019     | -1893.2531       | -0.0096                   | 0.0036                     |
| 1.18905     | -1893.2535       | -0.0101                   | 0.0032                     |
| 1.29787     | -1893.2540       | -0.0105                   | 0.0027                     |
| 1.40670     | -1893.2544       | -0.0109                   | 0.0023                     |
| 1.51554     | -1893.2548       | -0.0113                   | 0.0019                     |
| 1.62444     | -1893.2551       | -0.0117                   | 0.0016                     |
| 1.73336     | -1893.2555       | -0.0120                   | 0.0012                     |
| 1.84233     | -1893.2558       | -0.0123                   | 0.0009                     |
| 1.95132     | -1893.2561       | -0.0127                   | 0.0006                     |
| 2.06034     | -1893.2564       | -0.0130                   | 0.0003                     |
| 2.16936     | -1893.2567       | -0.0133                   | 0.0000                     |

**Table S11:** Intrinsic reaction coordinate (IRC) data for the abstraction of H-atom of DTP by Cl-atom calculated at the **MP2/cc-pVTZ level of theory (R2B)**.

| <b>Coordinates</b> | <b>Energy (Hartree)</b> | <b>Relative Energy (Hartree)</b> | <b>Relative Energy (kcal/mol)</b> |
|--------------------|-------------------------|----------------------------------|-----------------------------------|
| -2.30775           | -1893.2474              | -0.0063                          | 0.0090                            |
| -2.19761           | -1893.2472              | -0.0060                          | 0.0092                            |
| -2.08746           | -1893.2469              | -0.0058                          | 0.0095                            |
| -1.97731           | -1893.2467              | -0.0055                          | 0.0097                            |
| -1.86717           | -1893.2464              | -0.0053                          | 0.0100                            |
| -1.75703           | -1893.2462              | -0.0050                          | 0.0102                            |
| -1.64691           | -1893.2459              | -0.0048                          | 0.0105                            |
| -1.53680           | -1893.2456              | -0.0045                          | 0.0108                            |
| -1.42673           | -1893.2453              | -0.0042                          | 0.0110                            |
| -1.31666           | -1893.2450              | -0.0039                          | 0.0113                            |
| -1.20662           | -1893.2447              | -0.0036                          | 0.0116                            |
| -1.09654           | -1893.2444              | -0.0033                          | 0.0119                            |
| -0.98646           | -1893.2441              | -0.0030                          | 0.0123                            |
| -0.87634           | -1893.2438              | -0.0027                          | 0.0126                            |
| -0.76623           | -1893.2435              | -0.0024                          | 0.0129                            |
| -0.65610           | -1893.2432              | -0.0020                          | 0.0132                            |
| -0.54602           | -1893.2428              | -0.0017                          | 0.0136                            |
| -0.43595           | -1893.2425              | -0.0013                          | 0.0139                            |
| -0.32614           | -1893.2421              | -0.0010                          | 0.0143                            |
| -0.21622           | -1893.2420              | -0.0006                          | 0.0014                            |
| -0.10841           | -1893.2418              | -0.0002                          | 0.0015                            |
| 0                  | -1893.2411              | 0.0000                           | 0.0153                            |
| 0.11001            | -1893.2420              | -0.0004                          | 0.0014                            |
| 0.22012            | -1893.2432              | -0.0021                          | 0.0132                            |
| 0.33025            | -1893.2458              | -0.0047                          | 0.0106                            |
| 0.44029            | -1893.2484              | -0.0072                          | 0.0080                            |
| 0.54710            | -1893.2499              | -0.0088                          | 0.0064                            |
| 0.65461            | -1893.2506              | -0.0095                          | 0.0058                            |
| 0.76429            | -1893.2512              | -0.0101                          | 0.0052                            |
| 0.87416            | -1893.2517              | -0.0106                          | 0.0046                            |
| 0.98403            | -1893.2523              | -0.0111                          | 0.0041                            |
| 1.09367            | -1893.2528              | -0.0116                          | 0.0036                            |
| 1.20322            | -1893.2532              | -0.0121                          | 0.0031                            |
| 1.31274            | -1893.2537              | -0.0126                          | 0.0027                            |
| 1.42249            | -1893.2541              | -0.0130                          | 0.0022                            |
| 1.53238            | -1893.2546              | -0.0135                          | 0.0018                            |
| 1.64234            | -1893.2550              | -0.0139                          | 0.0014                            |
| 1.75236            | -1893.2554              | -0.0142                          | 0.0010                            |
| 1.86240            | -1893.2557              | -0.0146                          | 0.0006                            |
| 1.97245            | -1893.2561              | -0.0150                          | 0.0003                            |
| 2.08251            | -1893.2564              | -0.0153                          | 0.0000                            |

**Table S12:** Intrinsic reaction coordinate (IRC) data for the abstraction of Cl-atom of DTP with Cl-atom calculated at the **MP2/cc-pVTZ level of theory (R3B)**.

| Coordinates | Energy (Hartree) | Relative Energy (Hartree) | Relative Energy (kcal/mol) |
|-------------|------------------|---------------------------|----------------------------|
| 10.1109     | -1893.2673       | -0.0003                   | -0.1882                    |
| 9.6361      | -1893.2670       | -0.0005                   | -0.0251                    |
| 9.1559      | -1893.2667       | 0.0002                    | 0.1694                     |
| 8.6738      | -1893.2664       | 0.0006                    | 0.3890                     |
| 8.1915      | -1893.2660       | 0.0010                    | 0.6526                     |
| 7.7090      | -1893.2655       | 0.0015                    | 0.9663                     |
| 7.2266      | -1893.2649       | 0.0021                    | 1.3303                     |
| 6.7441      | -1893.2642       | 0.0028                    | 1.7632                     |
| 6.2617      | -1893.2634       | 0.0036                    | 2.2652                     |
| 5.7793      | -1893.2625       | 0.0045                    | 2.8488                     |
| 5.2969      | -1893.2614       | 0.0056                    | 3.5265                     |
| 4.8149      | -1893.2601       | 0.0068                    | 4.3109                     |
| 4.3338      | -1893.2586       | 0.0083                    | 5.2396                     |
| 3.8538      | -1893.2568       | 0.0102                    | 6.4005                     |
| 3.3735      | -1893.2543       | 0.0126                    | 7.9378                     |
| 2.8922      | -1893.2510       | 0.0160                    | 10.0462                    |
| 2.4108      | -1893.2465       | 0.0204                    | 12.8512                    |
| 1.9286      | -1893.2407       | 0.0261                    | 16.4154                    |
| 1.4465      | -1893.2307       | 0.0326                    | 20.4816                    |
| 0.9642      | -1893.2285       | 0.0385                    | 24.1650                    |
| 0.4819      | -1893.2248       | 0.0422                    | 26.4993                    |
| 0           | -1893.2237       | 0.0433                    | 27.1833                    |
| -0.4721     | -1893.2242       | 0.0427                    | 26.8381                    |
| -0.9437     | -1893.2251       | 0.0419                    | 26.3173                    |
| -1.4222     | -1893.2258       | 0.0412                    | 25.8718                    |
| -1.8915     | -1893.2265       | 0.0405                    | 25.4388                    |
| -2.3643     | -1893.2270       | 0.0399                    | 25.0874                    |
| -2.8427     | -1893.2275       | 0.0394                    | 24.7737                    |
| -3.3241     | -1893.2280       | 0.0390                    | 24.4913                    |
| -3.8062     | -1893.2283       | 0.0386                    | 24.2528                    |
| -4.2886     | -1893.2287       | 0.0383                    | 24.0521                    |
| -4.7711     | -1893.2289       | 0.0380                    | 23.8889                    |
| -5.2536     | -1893.2291       | 0.0378                    | 23.7571                    |
| -5.7360     | -1893.2293       | 0.0377                    | 23.6567                    |
| -6.2185     | -1893.2294       | 0.0375                    | 23.5814                    |
| -6.7010     | -1893.2295       | 0.0375                    | 23.5312                    |

**Table S13:** Intrinsic reaction coordinate (IRC) data for the abstraction of Cl-atom of DTP with Cl-atom calculated at the **MP2/cc-pVTZ level of theory (R4B)**.

| <b>Coordinates</b> | <b>Energy (Hartree)</b> | <b>Relative Energy (Hartree)</b> | <b>Relative Energy (kcal/mol)</b> |
|--------------------|-------------------------|----------------------------------|-----------------------------------|
| -6.52843           | -1893.2243              | 0.0396                           | 24.8866                           |
| -6.11564           | -1893.2242              | 0.0398                           | 24.9933                           |
| -5.70286           | -1893.2240              | 0.0400                           | 25.1188                           |
| -5.2901            | -1893.2237              | 0.0402                           | 25.2631                           |
| -4.87747           | -1893.2235              | 0.0405                           | 25.4263                           |
| -4.465             | -1893.2232              | 0.0408                           | 25.6145                           |
| -4.05314           | -1893.2228              | 0.0411                           | 25.8279                           |
| -3.64258           | -1893.2225              | 0.0415                           | 26.0538                           |
| -3.23658           | -1893.2221              | 0.0419                           | 26.3048                           |
| -2.82771           | -1893.2216              | 0.0423                           | 26.5997                           |
| -2.42203           | -1893.2211              | 0.0428                           | 26.9009                           |
| -2.01535           | -1893.2206              | 0.04340                          | 27.2335                           |
| -1.62683           | -1893.2201              | 0.0439                           | 27.5660                           |
| -1.22628           | -1893.2194              | 0.0446                           | 28.0053                           |
| -0.81507           | -1893.2187              | 0.0453                           | 28.4508                           |
| -0.40757           | -1893.2179              | 0.0460                           | 28.9152                           |
| 0                  | -1893.2175              | 0.0465                           | 29.1850                           |
| 0.4124             | -1893.2183              | 0.0457                           | 28.6893                           |
| 0.82506            | -1893.2211              | 0.0429                           | 26.9197                           |
| 1.23782            | -1893.2259              | 0.0380                           | 23.8889                           |
| 1.65055            | -1893.2319              | 0.0321                           | 20.1615                           |
| 2.06312            | -1893.2377              | 0.0262                           | 16.4969                           |
| 2.47556            | -1893.2427              | 0.0213                           | 13.3845                           |
| 2.88785            | -1893.2466              | 0.0173                           | 10.8871                           |
| 3.29987            | -1893.2497              | 0.0142                           | 8.9544                            |
| 3.71134            | -1893.2521              | 0.0119                           | 7.4923                            |
| 4.1223             | -1893.2539              | 0.0101                           | 6.3565                            |
| 4.53375            | -1893.2553              | 0.0086                           | 5.4341                            |
| 4.94599            | -1893.2566              | 0.0074                           | 4.6497                            |
| 5.35865            | -1893.2577              | 0.0063                           | 3.9532                            |
| 5.77146            | -1893.2587              | 0.0053                           | 3.3445                            |
| 6.18431            | -1893.2595              | 0.0044                           | 2.8112                            |
| 6.59717            | -1893.2603              | 0.0037                           | 2.3405                            |
| 7.01003            | -1893.2609              | 0.0030                           | 1.9264                            |
| 7.42289            | -1893.2615              | 0.0024                           | 1.5562                            |
| 7.83574            | -1893.2620              | 0.0019                           | 1.2424                            |
| 8.24859            | -1893.2625              | 0.0015                           | 0.9600                            |
| 8.66142            | -1893.2629              | 0.0011                           | 0.7153                            |
| 9.07414            | -1893.2632              | 0.0008                           | 0.5020                            |
| 9.48633            | -1893.2635              | 0.00049                          | 0.3074                            |
| 9.89681            | -1893.2638              | 0.00023                          | 0.1443                            |
| 10.30507           | -1893.2640              | 0                                | 0                                 |

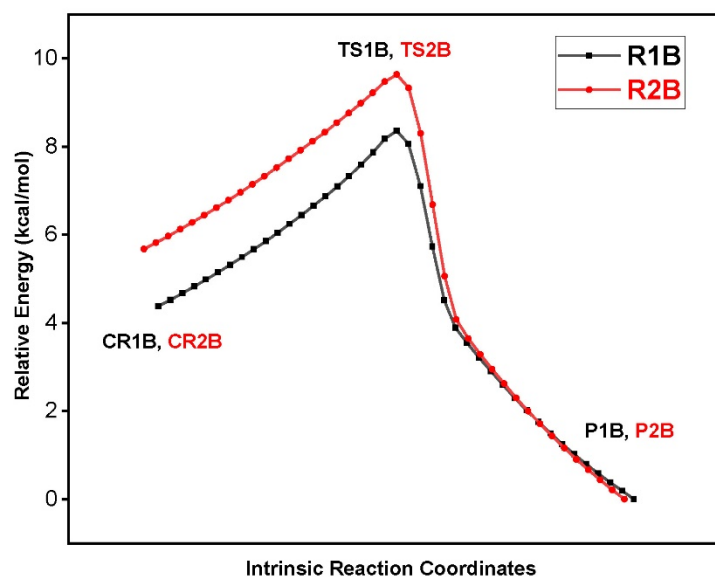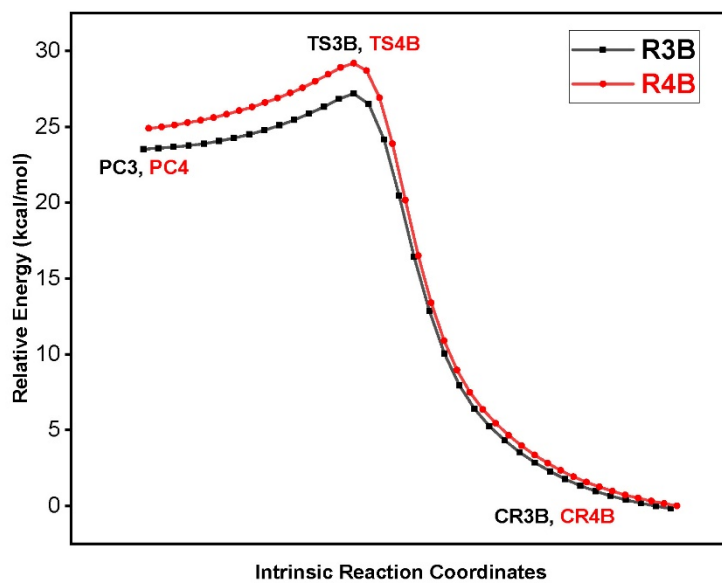

**Figure S4:** Intrinsic reaction coordinate (IRC) plots for the R1B-R2B and R3B-R4B at the **MP2/cc-pVTZ** level of theory.

**Table S14:** Single point energy calculated at the **CCSD(T)/aug-cc-pVTZ//MP2/cc-pVTZ** level of theory of all the species involved in the reaction (A).

| Reactions                                                 | Species                   | Energy (kcal/mol) |
|-----------------------------------------------------------|---------------------------|-------------------|
| <b>CF<sub>3</sub>CH<sub>2</sub>CCl<sub>2</sub>F + ·OH</b> | <b>Reactants</b>          | -1509.4323        |
| <b>Reaction 1A</b>                                        | <b>CR1A</b>               | -1509.4384        |
|                                                           | <b>TS1A</b>               | -1509.4221        |
|                                                           | <b>PC1A</b>               | -1509.4602        |
|                                                           | <b>P1A+H<sub>2</sub>O</b> | -1509.4533        |
| <b>Reaction 2A</b>                                        | <b>CR2A</b>               | -1509.4383        |
|                                                           | <b>TS2A</b>               | -1509.4214        |
|                                                           | <b>PC2A</b>               | -1509.4594        |
|                                                           | <b>P2A+H<sub>2</sub>O</b> | -1509.4520        |
| <b>Reaction 3A</b>                                        | <b>CR3A</b>               | -1509.4345        |
|                                                           | <b>TS3A</b>               | -1509.3924        |
|                                                           | <b>PC3A</b>               | -1509.4002        |
|                                                           | <b>P3A+HOCl</b>           | -1509.3952        |
| <b>Reaction 4A</b>                                        | <b>CR4A</b>               | -1509.4364        |
|                                                           | <b>TS4A</b>               | -1509.3905        |
|                                                           | <b>PC4A</b>               | -1509.4029        |
|                                                           | <b>P4A+HOCl</b>           | -1509.3948        |

**Table S15:** Single point energy calculated at the **CCSD(T)/aug-cc-pVTZ//MP2/cc-pVTZ** level of theory of all the species involved in the reaction (B).

| Reaction                                                 | Species                   | Energy (kcal/mol) |
|----------------------------------------------------------|---------------------------|-------------------|
| <b>CF<sub>3</sub>CH<sub>2</sub>CCl<sub>2</sub>F + Cl</b> | <b>Reactants</b>          | -1893.4630        |
| <b>Reaction 1B</b>                                       | <b>CR1B</b>               | -1893.4671        |
|                                                          | <b>TS1B</b>               | -1893.4438        |
|                                                          | <b>PC1B</b>               | -1893.4588        |
|                                                          | <b>P1B+HCl</b>            | -1893.4543        |
| <b>Reaction 2B</b>                                       | <b>CR2B</b>               | -1893.4674        |
|                                                          | <b>TS2B</b>               | -1893.4417        |
|                                                          | <b>PC2B</b>               | -1893.4580        |
|                                                          | <b>P2B+HCl</b>            | -1893.4530        |
| <b>Reaction 3B</b>                                       | <b>CR3B</b>               | -1893.4671        |
|                                                          | <b>TS3B</b>               | -1893.4274        |
|                                                          | <b>PC3B</b>               | -1893.4290        |
|                                                          | <b>P3B+Cl<sub>2</sub></b> | -1893.4239        |
| <b>Reaction 4B</b>                                       | <b>CR4B</b>               | -1893.4655        |
|                                                          | <b>TS4B</b>               | -1893.4245        |
|                                                          | <b>PC4B</b>               | -1893.4275        |
|                                                          | <b>P4B+Cl<sub>2</sub></b> | -1893.4237        |



**Table S16:** Relative energies of the species involved in the reaction of DTP with  $\cdot\text{OH}$  and  $\text{Cl}$  at the CCSD(T)/aug-cc-pVTZ//MP2/cc-pVTZ level of theory. Energies are in kcal/mol.

| Species                                                                                     | Relative Energy | Species                                                                                | Relative Energy |
|---------------------------------------------------------------------------------------------|-----------------|----------------------------------------------------------------------------------------|-----------------|
| <b><math>\text{CCl}_2\text{FCH}_2\text{CF}_3</math> (DTP) + <math>\cdot\text{OH}</math></b> |                 | <b><math>\text{CCl}_2\text{FCH}_2\text{CF}_3</math> (DTP) + <math>\text{Cl}</math></b> |                 |
| <b>R (DTP + <math>\cdot\text{OH}</math>)</b>                                                | 0.00            | <b>R (DTP + Cl)</b>                                                                    | 0.00            |
| <b>CR1A</b>                                                                                 | -3.79           | <b>CR1B</b>                                                                            | -2.58           |
| <b>TS1A</b>                                                                                 | 6.36            | <b>TS1B</b>                                                                            | 12.07           |
| <b>PC1A</b>                                                                                 | -17.49          | <b>PC1B</b>                                                                            | 2.63            |
| <b>P1A + <math>\text{H}_2\text{O}</math></b>                                                | -13.17          | <b>P1B + <math>\text{H}_2\text{O}</math></b>                                           | 5.48            |
| <b>CR2A</b>                                                                                 | -3.75           | <b>CR2B</b>                                                                            | -2.75           |
| <b>TS2A</b>                                                                                 | 6.80            | <b>TS2B</b>                                                                            | 13.38           |
| <b>PC2A</b>                                                                                 | -16.97          | <b>PC2B</b>                                                                            | 3.15            |
| <b>P2A + <math>\text{H}_2\text{O}</math></b>                                                | -12.36          | <b>P2B + <math>\text{H}_2\text{O}</math></b>                                           | 6.29            |
| <b>CR3A</b>                                                                                 | -1.36           | <b>CR3B</b>                                                                            | -2.59           |
| <b>TS3A</b>                                                                                 | 25.08           | <b>TS3B</b>                                                                            | 22.30           |
| <b>PC3A</b>                                                                                 | 20.17           | <b>PC3B</b>                                                                            | 21.34           |
| <b>P3A + HOCl</b>                                                                           | 23.27           | <b>P3B + HOCl</b>                                                                      | 24.51           |
| <b>CR4A</b>                                                                                 | -2.55           | <b>CR4B</b>                                                                            | -1.55           |
| <b>TS4A</b>                                                                                 | 26.27           | <b>TS4B</b>                                                                            | 24.13           |
| <b>PC4A</b>                                                                                 | 18.48           | <b>PC4B</b>                                                                            | 22.25           |
| <b>P4A + HOCl</b>                                                                           | 23.56           | <b>P4B + HOCl</b>                                                                      | 24.63           |

Figure 4 of the manuscript has been prepared using this data.

**Table S17: *T1*-diagnostic and spin-contamination values,  $\langle S^2 \rangle$  for all the stationary points involved in the reaction of DTP with OH-radical calculated at the CCSD(T)/aug-cc-pVTZ level of theory.**

| <b>Reactions</b>   | <b>Species</b>                                    | <b><i>T1</i>-Diagnostic</b> | <b><math>\langle S^2 \rangle</math> values</b> |
|--------------------|---------------------------------------------------|-----------------------------|------------------------------------------------|
| <b>Reactants</b>   | CF <sub>3</sub> CH <sub>2</sub> CFCl <sub>2</sub> | 0.0118                      | 0.0                                            |
|                    | OH                                                | 0.0099                      | 0.7499                                         |
| <b>Reaction 1A</b> | CR1A                                              | 0.0117                      | 0.7499                                         |
|                    | TS1A                                              | 0.0160                      | 0.7497                                         |
|                    | PC1A                                              | 0.0130                      | 0.7499                                         |
|                    | P1A                                               | 0.0133                      | 0.7499                                         |
|                    | H <sub>2</sub> O                                  | 0.0100                      | 0.0                                            |
| <b>Reaction 2A</b> | CR2A                                              | 0.0118                      | 0.7499                                         |
|                    | TS2A                                              | 0.0159                      | 0.7497                                         |
|                    | PC2A                                              | 0.0130                      | 0.7499                                         |
|                    | P2A                                               | 0.0133                      | 0.7499                                         |
| <b>Reaction 3A</b> | CR3A                                              | 0.0117                      | 0.7499                                         |
|                    | TS3A                                              | 0.0191                      | 0.7479                                         |
|                    | PC3A                                              | 0.0141                      | 0.7499                                         |
|                    | P3A                                               | 0.0140                      | 0.7499                                         |
|                    | HOCl                                              | 0.0113                      | 0.0                                            |
| <b>Reaction 4A</b> | CR4A                                              | 0.0117                      | 0.7499                                         |
|                    | TS4A                                              | 0.0188                      | 0.7480                                         |
|                    | PC4A                                              | 0.0135                      | 0.7499                                         |
|                    | P4A                                               | 0.0139                      | 0.7499                                         |

**Table S18: *T1*-diagnostic and spin-contamination values,  $\langle S^2 \rangle$  for all the stationary points involved in the reaction of DTP with Cl-atom calculated at the CCSD(T)/aug-cc-pVTZ level of theory.**

| Reactions   | Species                                          | <i>T1</i> -Diagnostic | $\langle S^2 \rangle$ values |
|-------------|--------------------------------------------------|-----------------------|------------------------------|
| Reactants   | CF <sub>3</sub> CH <sub>2</sub> CFC <sub>2</sub> | 0.0118                | 0.0                          |
|             | Cl                                               | 0.0066                | 0.7499                       |
| Reaction 1B | CR1B                                             | 0.0120                | 0.7499                       |
|             | TS1B                                             | 0.0134                | 0.7495                       |
|             | PC1B                                             | 0.0127                | 0.7499                       |
|             | P1B                                              | 0.0132                | 0.7499                       |
|             | HCl                                              | 0.0061                | 0.0                          |
| Reaction 2B | CR2B                                             | 0.0119                | 0.7488                       |
|             | TS2B                                             | 0.0134                | 0.7496                       |
|             | PC2B                                             | 0.0127                | 0.7499                       |
|             | P2B                                              | 0.0133                | 0.7499                       |
| Reaction 3B | CR3B                                             | 0.0120                | 0.7499                       |
|             | TS3B                                             | 0.0175                | 0.7481                       |
|             | PC3B                                             | 0.0139                | 0.7499                       |
|             | P3B                                              | 0.0140                | 0.7499                       |
|             | Cl <sub>2</sub>                                  | 0.0085                | 0.0                          |
| Reaction 4B | CR4B                                             | 0.0012                | 0.7499                       |
|             | TS4B                                             | 0.0174                | 0.7482                       |
|             | PC4B                                             | 0.0133                | 0.7499                       |
|             | P4B                                              | 0.0130                | 0.7499                       |

**Table S19:** Calculated Equilibrium constant ( $K_{eq}$ ), unimolecular rate coefficient ( $k_{uni}$ ) and overall rate coefficients ( $k_{1A}$ ,  $k_{2A}$ ,  $k_{3A}$ ,  $k_{4A}$ ) for the reaction channel **R1A**, **R2A**, **R3A**, and **R4A** in the 200-400 K temperature range at the **M06-2X level of theory**. Units of rate coefficients are in  $\text{cm}^3 \text{ molecule}^{-1} \text{ s}^{-1}$ .

| <i>k<sub>1A</sub></i> |                       |                      |                        |
|-----------------------|-----------------------|----------------------|------------------------|
| <i>Temperature</i>    | <i>K<sub>eq</sub></i> | <i>k<sub>2</sub></i> | <i>k<sub>1A</sub></i>  |
| 200                   | 0.143                 | $4.00 \times 10^7$   | $9.49 \times 10^{-15}$ |
| 220                   | 0.0514                | $6.50 \times 10^7$   | $5.55 \times 10^{-15}$ |
| 240                   | 0.022                 | $1.00 \times 10^8$   | $3.65 \times 10^{-15}$ |
| 260                   | 0.0108                | $1.60 \times 10^8$   | $2.87 \times 10^{-15}$ |
| 280                   | 0.0059                | $2.50 \times 10^8$   | $2.46 \times 10^{-15}$ |
| 298                   | 0.0037                | $3.60 \times 10^8$   | $2.22 \times 10^{-15}$ |
| 300                   | 0.0035                | $3.70 \times 10^8$   | $2.18 \times 10^{-15}$ |
| 320                   | 0.0023                | $5.50 \times 10^8$   | $2.06 \times 10^{-15}$ |
| 340                   | 0.0015                | $8.00 \times 10^8$   | $2.03 \times 10^{-15}$ |
| 360                   | 0.0011                | $1.10 \times 10^9$   | $1.97 \times 10^{-15}$ |
| 380                   | 0.0008                | $1.60 \times 10^9$   | $2.12 \times 10^{-15}$ |
| 400                   | 0.0006                | $2.10 \times 10^9$   | $2.13 \times 10^{-15}$ |

| <i>k<sub>2A</sub> (R2A)</i> |                       |                      |                        |
|-----------------------------|-----------------------|----------------------|------------------------|
| <i>Temperature</i>          | <i>K<sub>eq</sub></i> | <i>k<sub>2</sub></i> | <i>k<sub>2A</sub></i>  |
| 200                         | 0.1430                | $4.00 \times 10^7$   | $9.49 \times 10^{-15}$ |
| 220                         | 0.0486                | $6.30 \times 10^7$   | $5.08 \times 10^{-15}$ |
| 240                         | 0.0200                | $9.80 \times 10^7$   | $3.25 \times 10^{-15}$ |
| 260                         | 0.0095                | $1.50 \times 10^8$   | $2.35 \times 10^{-15}$ |
| 280                         | 0.0050                | $2.30 \times 10^8$   | $1.91 \times 10^{-15}$ |
| 298                         | 0.0031                | $3.30 \times 10^8$   | $1.67 \times 10^{-15}$ |
| 300                         | 0.0029                | $3.40 \times 10^8$   | $1.64 \times 10^{-15}$ |
| 320                         | 0.0018                | $5.10 \times 10^8$   | $1.53 \times 10^{-15}$ |
| 340                         | 0.0012                | $7.30 \times 10^8$   | $1.44 \times 10^{-15}$ |
| 360                         | 0.0008                | $1.00 \times 10^9$   | $1.38 \times 10^{-15}$ |
| 380                         | 0.0006                | $1.40 \times 10^9$   | $1.40 \times 10^{-15}$ |
| 400                         | 0.0005                | $1.90 \times 10^9$   | $1.43 \times 10^{-15}$ |

| <b><i>k<sub>3A</sub> (R3A)</i></b> |                              |                             |                              |
|------------------------------------|------------------------------|-----------------------------|------------------------------|
| <b><i>Temperature</i></b>          | <b><i>K<sub>eq</sub></i></b> | <b><i>k<sub>2</sub></i></b> | <b><i>k<sub>3A</sub></i></b> |
| 200                                | 0.1920                       | $1.20 \times 10^{-16}$      | $3.83 \times 10^{-38}$       |
| 220                                | 0.06870                      | $5.50 \times 10^{-14}$      | $6.27 \times 10^{-36}$       |
| 240                                | 0.02930                      | $9.00 \times 10^{-12}$      | $4.38 \times 10^{-34}$       |
| 260                                | 0.01430                      | $6.80 \times 10^{-10}$      | $1.61 \times 10^{-32}$       |
| 280                                | 0.00782                      | $2.70 \times 10^{-8}$       | $3.51 \times 10^{-31}$       |
| 298                                | 0.00488                      | $5.10 \times 10^{-7}$       | $4.13 \times 10^{-30}$       |
| 300                                | 0.00465                      | $6.80 \times 10^{-7}$       | $5.25 \times 10^{-30}$       |
| 320                                | 0.00296                      | $1.10 \times 10^{-5}$       | $5.41 \times 10^{-29}$       |
| 340                                | 0.00200                      | $1.30 \times 10^{-4}$       | $4.32 \times 10^{-28}$       |
| 360                                | 0.00142                      | $1.20 \times 10^{-3}$       | $2.83 \times 10^{-27}$       |
| 380                                | 0.00104                      | $8.80 \times 10^{-3}$       | $1.52 \times 10^{-26}$       |
| 400                                | 0.00080                      | $5.20 \times 10^{-2}$       | $6.87 \times 10^{-26}$       |

| <b><i>k<sub>4A</sub> (R4A)</i></b> |                              |                             |                              |
|------------------------------------|------------------------------|-----------------------------|------------------------------|
| <b><i>Temperature</i></b>          | <b><i>K<sub>eq</sub></i></b> | <b><i>k<sub>2</sub></i></b> | <b><i>k<sub>4A</sub></i></b> |
| 200                                | 0.1520                       | $1.80 \times 10^{-19}$      | $4.54 \times 10^{-41}$       |
| 220                                | 0.0542                       | $1.30 \times 10^{-16}$      | $1.17 \times 10^{-38}$       |
| 240                                | 0.0231                       | $3.40 \times 10^{-14}$      | $1.30 \times 10^{-36}$       |
| 260                                | 0.0113                       | $3.80 \times 10^{-12}$      | $7.13 \times 10^{-35}$       |
| 280                                | 0.0061                       | $2.10 \times 10^{-10}$      | $2.13 \times 10^{-33}$       |
| 298                                | 0.0038                       | $5.10 \times 10^{-9}$       | $3.23 \times 10^{-32}$       |
| 300                                | 0.0036                       | $6.90 \times 10^{-9}$       | $4.16 \times 10^{-32}$       |
| 320                                | 0.0023                       | $1.50 \times 10^{-7}$       | $5.75 \times 10^{-31}$       |
| 340                                | 0.0016                       | $2.20 \times 10^{-6}$       | $5.66 \times 10^{-30}$       |
| 360                                | 0.0011                       | $2.40 \times 10^{-5}$       | $4.38 \times 10^{-29}$       |
| 380                                | 0.0008                       | $2.00 \times 10^{-4}$       | $2.68 \times 10^{-28}$       |
| 400                                | 0.0006                       | $1.40 \times 10^{-3}$       | $1.43 \times 10^{-27}$       |

**Table S20:** Calculated overall rate coefficients for the reaction of  $\text{CCl}_2\text{FCH}_2\text{CF}_3$  with OH-radical in the 200-400 K temperature range at the **M06-2X level of theory**. Units are in  $\text{cm}^3 \text{ molecule}^{-1} \text{ s}^{-1}$ .

| <i>Temperature</i> | <i>k<sub>1A</sub></i>  | <i>k<sub>2A</sub></i>  | <i>k<sub>3A</sub></i>  | <i>k<sub>4A</sub></i>  | <i>k<sub>over</sub></i> |
|--------------------|------------------------|------------------------|------------------------|------------------------|-------------------------|
| 200                | $9.49 \times 10^{-15}$ | $9.49 \times 10^{-15}$ | $3.83 \times 10^{-38}$ | $4.54 \times 10^{-41}$ | $1.89 \times 10^{-14}$  |
| 220                | $5.55 \times 10^{-15}$ | $5.08 \times 10^{-15}$ | $6.27 \times 10^{-36}$ | $1.17 \times 10^{-38}$ | $1.06 \times 10^{-14}$  |
| 240                | $3.65 \times 10^{-15}$ | $3.25 \times 10^{-15}$ | $4.38 \times 10^{-34}$ | $1.30 \times 10^{-36}$ | $6.91 \times 10^{-15}$  |
| 260                | $2.87 \times 10^{-15}$ | $2.35 \times 10^{-15}$ | $1.61 \times 10^{-32}$ | $7.13 \times 10^{-35}$ | $5.22 \times 10^{-15}$  |
| 280                | $2.46 \times 10^{-15}$ | $1.91 \times 10^{-15}$ | $3.51 \times 10^{-31}$ | $2.13 \times 10^{-33}$ | $4.37 \times 10^{-15}$  |
| 298                | $2.22 \times 10^{-15}$ | $1.67 \times 10^{-15}$ | $4.13 \times 10^{-30}$ | $3.23 \times 10^{-32}$ | $3.88 \times 10^{-15}$  |
| 300                | $2.18 \times 10^{-15}$ | $1.64 \times 10^{-15}$ | $5.25 \times 10^{-30}$ | $4.16 \times 10^{-32}$ | $3.81 \times 10^{-15}$  |
| 320                | $2.06 \times 10^{-15}$ | $1.53 \times 10^{-15}$ | $5.41 \times 10^{-29}$ | $5.75 \times 10^{-31}$ | $3.59 \times 10^{-15}$  |
| 340                | $2.03 \times 10^{-15}$ | $1.44 \times 10^{-15}$ | $4.32 \times 10^{-28}$ | $5.66 \times 10^{-30}$ | $3.47 \times 10^{-15}$  |
| 360                | $1.97 \times 10^{-15}$ | $1.38 \times 10^{-15}$ | $2.83 \times 10^{-27}$ | $4.38 \times 10^{-29}$ | $3.35 \times 10^{-15}$  |
| 380                | $2.13 \times 10^{-15}$ | $1.40 \times 10^{-15}$ | $1.52 \times 10^{-26}$ | $2.68 \times 10^{-28}$ | $3.52 \times 10^{-15}$  |
| 400                | $2.13 \times 10^{-15}$ | $1.43 \times 10^{-15}$ | $6.87 \times 10^{-26}$ | $1.43 \times 10^{-27}$ | $3.55 \times 10^{-15}$  |

**Table S21:** Calculated Equilibrium constant ( $K_{eq}$ ), unimolecular rate coefficient ( $k_{uni}$ ) and overall rate coefficients ( $k_{1B}$ ,  $k_{2B}$ ,  $k_{3B}$ ,  $k_{4B}$ ) for the reaction channel **R1B**, **R2B**, **R3B**, and **R4B** in the 200-400 K temperature range at the **M06-2X level of theory**. Units of rate coefficients are in  $\text{cm}^3 \text{ molecule}^{-1} \text{ s}^{-1}$ .

| <i><math>k_{1B}</math> (R1B)</i> |                            |                         |                            |
|----------------------------------|----------------------------|-------------------------|----------------------------|
| <i>Temperature</i>               | <i><math>K_{eq}</math></i> | <i><math>k_2</math></i> | <i><math>k_{1B}</math></i> |
| 200                              | 0.468                      | $1.00 \times 10^3$      | $7.77 \times 10^{-19}$     |
| 220                              | 0.198                      | $5.20 \times 10^3$      | $1.71 \times 10^{-18}$     |
| 240                              | 0.097                      | $2.20 \times 10^4$      | $3.55 \times 10^{-18}$     |
| 260                              | 0.053                      | $7.90 \times 10^4$      | $6.99 \times 10^{-18}$     |
| 280                              | 0.032                      | $2.40 \times 10^5$      | $1.28 \times 10^{-17}$     |
| 298                              | 0.021                      | $6.10 \times 10^5$      | $2.17 \times 10^{-17}$     |
| 300                              | 0.021                      | $6.70 \times 10^5$      | $2.29 \times 10^{-17}$     |
| 320                              | 0.014                      | $1.60 \times 10^6$      | $3.72 \times 10^{-17}$     |
| 340                              | 0.010                      | $3.60 \times 10^6$      | $5.98 \times 10^{-17}$     |
| 360                              | 0.007                      | $7.50 \times 10^6$      | $9.27 \times 10^{-17}$     |
| 380                              | 0.006                      | $1.50 \times 10^7$      | $1.42 \times 10^{-16}$     |
| 400                              | 0.005                      | $2.60 \times 10^7$      | $1.94 \times 10^{-16}$     |

| <i><math>k_{2B}</math> (R2B)</i> |                            |                         |                            |
|----------------------------------|----------------------------|-------------------------|----------------------------|
| <i>Temperature</i>               | <i><math>K_{eq}</math></i> | <i><math>k_2</math></i> | <i><math>k_{2B}</math></i> |
| 200                              | 0.2360                     | $1.90 \times 10^2$      | $7.45 \times 10^{-20}$     |
| 220                              | 0.0952                     | $1.20 \times 10^3$      | $1.90 \times 10^{-19}$     |
| 240                              | 0.0448                     | $5.90 \times 10^3$      | $4.39 \times 10^{-19}$     |
| 260                              | 0.0238                     | $2.50 \times 10^4$      | $9.88 \times 10^{-19}$     |
| 280                              | 0.0138                     | $8.80 \times 10^4$      | $2.02 \times 10^{-18}$     |
| 298                              | 0.0091                     | $2.50 \times 10^5$      | $3.76 \times 10^{-18}$     |
| 300                              | 0.0087                     | $2.70 \times 10^5$      | $3.89 \times 10^{-18}$     |
| 320                              | 0.0058                     | $7.50 \times 10^5$      | $7.20 \times 10^{-18}$     |
| 340                              | 0.0040                     | $1.80 \times 10^6$      | $1.21 \times 10^{-17}$     |
| 360                              | 0.0029                     | $4.20 \times 10^6$      | $2.06 \times 10^{-17}$     |
| 380                              | 0.0022                     | $8.80 \times 10^6$      | $3.26 \times 10^{-17}$     |
| 400                              | 0.0017                     | $1.70 \times 10^7$      | $4.88 \times 10^{-17}$     |

| <i>k<sub>3B</sub> (R3B)</i> |                       |                        |                        |
|-----------------------------|-----------------------|------------------------|------------------------|
| <i>Temperature</i>          | <i>K<sub>eq</sub></i> | <i>k<sub>2</sub></i>   | <i>k<sub>3B</sub></i>  |
| 200                         | 0.045                 | $7.20 \times 10^{-14}$ | $5.34 \times 10^{-36}$ |
| 220                         | 0.190                 | $1.80 \times 10^{-11}$ | $5.68 \times 10^{-33}$ |
| 240                         | 0.094                 | $1.80 \times 10^{-9}$  | $2.80 \times 10^{-31}$ |
| 260                         | 0.052                 | $9.20 \times 10^{-8}$  | $7.87 \times 10^{-30}$ |
| 280                         | 0.031                 | $2.60 \times 10^{-6}$  | $1.34 \times 10^{-28}$ |
| 298                         | 0.021                 | $3.80 \times 10^{-5}$  | $1.31 \times 10^{-27}$ |
| 300                         | 0.020                 | $4.80 \times 10^{-5}$  | $1.59 \times 10^{-27}$ |
| 320                         | 0.014                 | $6.20 \times 10^{-4}$  | $1.40 \times 10^{-26}$ |
| 340                         | 0.010                 | $5.90 \times 10^{-3}$  | $9.56 \times 10^{-26}$ |
| 360                         | 0.007                 | $4.20 \times 10^{-2}$  | $5.06 \times 10^{-25}$ |
| 380                         | 0.006                 | $2.60 \times 10^{-1}$  | $2.41 \times 10^{-24}$ |
| 400                         | 0.044                 | $1.30 \times 10^0$     | $9.52 \times 10^{-23}$ |

| <i>k<sub>4B</sub> (R4B)</i> |                       |                        |                        |
|-----------------------------|-----------------------|------------------------|------------------------|
| <i>Temperature</i>          | <i>K<sub>eq</sub></i> | <i>k<sub>2</sub></i>   | <i>k<sub>4B</sub></i>  |
| 200                         | 0.2740                | $1.50 \times 10^{-14}$ | $6.82 \times 10^{-36}$ |
| 220                         | 0.1100                | $4.50 \times 10^{-12}$ | $8.22 \times 10^{-34}$ |
| 240                         | 0.0519                | $5.20 \times 10^{-10}$ | $4.48 \times 10^{-32}$ |
| 260                         | 0.0275                | $2.90 \times 10^{-8}$  | $1.32 \times 10^{-30}$ |
| 280                         | 0.0160                | $9.10 \times 10^{-7}$  | $2.42 \times 10^{-29}$ |
| 298                         | 0.0104                | $1.40 \times 10^{-5}$  | $2.42 \times 10^{-28}$ |
| 300                         | 0.0100                | $1.80 \times 10^{-5}$  | $2.99 \times 10^{-28}$ |
| 320                         | 0.0067                | $2.50 \times 10^{-4}$  | $2.76 \times 10^{-27}$ |
| 340                         | 0.0047                | $2.60 \times 10^{-3}$  | $2.01 \times 10^{-26}$ |
| 360                         | 0.0034                | $2.00 \times 10^{-2}$  | $1.13 \times 10^{-25}$ |
| 380                         | 0.0026                | $1.30 \times 10^{-1}$  | $5.53 \times 10^{-25}$ |
| 400                         | 0.0019                | $6.80 \times 10^{-1}$  | $2.25 \times 10^{-24}$ |



**Table S22:** Calculated overall rate coefficients for the reaction of  $\text{CCl}_2\text{FCH}_2\text{CF}_3$  with Cl-atom in the 200-400 K temperature range at the **M06-2X level of theory**. Units are in  $\text{cm}^3 \text{ molecule}^{-1} \text{ s}^{-1}$ .

| <i>Temperature</i> | <i>k<sub>1B</sub></i>  | <i>k<sub>2B</sub></i>  | <i>k<sub>3B</sub></i>  | <i>k<sub>4B</sub></i>  | <i>k<sub>o,Cl</sub></i> |
|--------------------|------------------------|------------------------|------------------------|------------------------|-------------------------|
| 200                | $7.77 \times 10^{-19}$ | $7.45 \times 10^{-20}$ | $5.34 \times 10^{-36}$ | $6.82 \times 10^{-36}$ | $8.52 \times 10^{-19}$  |
| 220                | $1.71 \times 10^{-18}$ | $1.90 \times 10^{-19}$ | $5.68 \times 10^{-33}$ | $8.22 \times 10^{-34}$ | $1.90 \times 10^{-18}$  |
| 240                | $3.55 \times 10^{-18}$ | $4.39 \times 10^{-19}$ | $2.80 \times 10^{-31}$ | $4.48 \times 10^{-32}$ | $3.99 \times 10^{-18}$  |
| 260                | $6.99 \times 10^{-18}$ | $9.88 \times 10^{-19}$ | $7.87 \times 10^{-30}$ | $1.32 \times 10^{-30}$ | $7.98 \times 10^{-18}$  |
| 280                | $1.28 \times 10^{-17}$ | $2.02 \times 10^{-18}$ | $1.34 \times 10^{-28}$ | $2.42 \times 10^{-29}$ | $1.48 \times 10^{-17}$  |
| 298                | $2.17 \times 10^{-17}$ | $3.76 \times 10^{-18}$ | $1.31 \times 10^{-27}$ | $2.42 \times 10^{-28}$ | $2.54 \times 10^{-17}$  |
| 300                | $2.29 \times 10^{-17}$ | $3.89 \times 10^{-18}$ | $1.59 \times 10^{-27}$ | $2.99 \times 10^{-28}$ | $2.68 \times 10^{-17}$  |
| 320                | $3.72 \times 10^{-17}$ | $7.20 \times 10^{-18}$ | $1.40 \times 10^{-26}$ | $2.76 \times 10^{-27}$ | $4.44 \times 10^{-17}$  |
| 340                | $5.98 \times 10^{-17}$ | $1.21 \times 10^{-17}$ | $9.56 \times 10^{-26}$ | $2.01 \times 10^{-26}$ | $7.19 \times 10^{-17}$  |
| 360                | $9.27 \times 10^{-17}$ | $2.06 \times 10^{-17}$ | $5.06 \times 10^{-25}$ | $1.13 \times 10^{-25}$ | $1.13 \times 10^{-16}$  |
| 380                | $1.42 \times 10^{-16}$ | $3.26 \times 10^{-17}$ | $2.41 \times 10^{-24}$ | $5.53 \times 10^{-25}$ | $1.75 \times 10^{-16}$  |
| 400                | $1.94 \times 10^{-16}$ | $4.88 \times 10^{-17}$ | $9.52 \times 10^{-23}$ | $2.25 \times 10^{-24}$ | $2.43 \times 10^{-16}$  |

## Notes 2: Eckart Unsymmetrical Potential Barrier.

The analytic form of the Eckart unsymmetrical potential barrier was proposed by Eckart and can model a variety of reasonable shapes. It calculates the probability of transmission  $p(E)$  through the corresponding 1D-barrier at energy  $E$ . The  $p(E)$  is given by [1,2]

$$p(E) = 1 - \frac{\cosh[2\pi(\alpha-\beta)] + \cosh[2\pi\delta]}{\cosh[2\pi(\alpha+\beta)] + \cosh[2\pi\delta]}$$

$$\alpha = \frac{1}{2\sqrt{C}}\sqrt{E}, \beta = \frac{1}{2\sqrt{C}}\sqrt{E-A}, \delta = \frac{1}{2\sqrt{C}}\sqrt{B-C}$$

Where,  $A = \Delta H_f - \Delta H_r$ ,  $B = (\sqrt{\Delta H_f} - \sqrt{\Delta H_r})^2$  and  $C = (h \text{Im}(v^\ddagger))^2 \left[ \frac{B^3}{(A^2 - B^2)} \right]^2$

The constants (A, B) determine the overall shape of the Eckart barrier are linked to the zero-point energy barriers in the reverse and forward directions. The Eckart tunnelling corrections [ $\chi(T)$ ] is obtained numerically integrating  $p(E)$  over Boltzmann distribution of energies

$$\chi(T) = \frac{e^{\frac{\Delta H_f}{k_b T}}}{k_b T} \int_0^\infty p(E) e^{\frac{-E}{k_b T}} dE$$

## References

1. C. Eckart, *Phys. Rev.* 1930, **35**, 1303– 1309.
2. H. S. Johnston and J. Heicklen, *J. Phys. Chem.*, 1962, **66**, 532– 533.

**Table S23:** Vibrational frequencies which are treated as hindered rotors for the species involved in the dominant reaction channels (R1A, R2A, R1B, and R2B) calculated at the M06-2X/cc-pVTZ level of theory. Units are in  $\text{cm}^{-1}$ .

| <b>Reactant<br/>(CF<sub>3</sub>CH<sub>2</sub>CFCl<sub>2</sub>)</b> | <b>R1A</b>  |             |             | <b>R2A</b>  |             |             |
|--------------------------------------------------------------------|-------------|-------------|-------------|-------------|-------------|-------------|
|                                                                    | <b>CR1A</b> | <b>TS1A</b> | <b>PC1A</b> | <b>CR2A</b> | <b>TS2A</b> | <b>PC2A</b> |
| 30.37                                                              | 66.84       | 17.20       | 27.45       | 28.92       | 33.68       | 25.62       |
| 123.34                                                             |             | 135.51      | 93.20       |             |             | 49.94       |
|                                                                    |             |             |             |             |             | 73.28       |

| <b>R1B</b>  |             |             | <b>R2B</b>  |             |             |
|-------------|-------------|-------------|-------------|-------------|-------------|
| <b>CR1B</b> | <b>TS1B</b> | <b>PC1B</b> | <b>CR2B</b> | <b>TS2B</b> | <b>PC2B</b> |
| 16.87       | 21.64       | 27.05       | 35.43       | 30.83       | 38.09       |
| 35.08       | 45.56       | 39.01       | 135.36      | 100.82      | 56.11       |
| 126.14      |             |             |             |             |             |

We have computed the partition functions using the hindered rotor (HR) approximation. The HR calculations for determining the partition function have been carried out using the Gaussian 16 software [1]. We used the keyword *freq = hinderedrotor* or *freq = readhinderedrotor* with additional keywords depending upon the structure of the species. The additional keywords have been added using the Gaussian 16 online manual. A few lower frequencies of the species involved in each reaction channels are treated as hindered rotors as shown in Table S23.

#### Notes 4: Hindered Rotor (HR) Approximation

The partition function is the bridge between the microscopic quantum mechanical properties of a molecule and its macroscopic thermodynamic properties, defined in the canonical ensemble as [2,3]

$$q = \sum_j e^{\frac{-E_j}{k_B T}} \quad (S1)$$

Where  $E_j$  is the energy of the  $j^{\text{th}}$  state. Then, the total partition function is given by [4]

$$q = q_{trans} q_{rot} q_{vib} q_{elec} \quad (S2)$$

Where  $q_{trans}$  is the translational partition function,  $q_{rot}$  is the rotational partition function,  $q_{vib}$  is the vibrational partition function, and  $q_{elec}$  is the electronic partition function.

Previous studies [2,4,5] have revealed that the harmonic oscillator (HO) approximation effectively describes high-frequency vibrational modes. However, HO approximation is often inadequate for low-frequency vibrational modes, primarily resulting from the torsional rotation of the single bonds [6,7]. Such type of modes undergo hindered rotation. A simple approach for computing vibrational partition functions involving torsional rotation assumes that the normal modes are decoupled. The HO approximation is then utilised for the non-torsional modes, while the HR approximation is applied to the torsional modes. Thus, the vibrational partition function ( $q_{vib}^{HO-HR}$ ) can be written as [2]

$$q_{vib}^{HO-HR} = q_{HO} q_{HR} \quad (S3)$$

$$q_{HO} = \prod_{i=1}^F \frac{e^{\left(-\frac{h\nu_i}{2k_B T}\right)}}{1 - e^{\left(-\frac{h\nu_i}{k_B T}\right)}} \quad (S4)$$

Where  $q^{HO}$  and  $q^{HR}$  are the partition functions of the quantum harmonic oscillator and hindered rotor, respectively;  $F$  is the number of non-torsional modes, and  $\nu_i$  is the vibrational frequency of the  $i^{\text{th}}$  non-torsional mode.

#### Computing hindered rotor partition function ( $q_{HR}$ )

One of the most widely used methods for dealing with torsions was derived by Pitzer and Gwinn [8] in the 1940s, who solved the Schrödinger equation numerically for one dimensional hindered rotor (1D-HR)

$$-\frac{\hbar^2}{2I_r} \frac{d^2 \Psi_{HR}}{d\varphi^2} + V \Psi_{HR} = E \Psi_{HR} \quad (S5)$$

Where  $\Psi_{HR}$ ,  $\varphi$ ,  $E$ , and  $I_r$  are the wave function of the HR, torsional angle, energy, and reduced moment of Inertia, respectively.  $\hbar$  is the Dirac constant ( $\frac{h}{2\pi}$ ), and  $V$  is the torsional potential.  $V$  is further expressed as

$$V = \frac{V_0}{2} (1 - \cos M\varphi) \quad (S6)$$

Where  $V_0$  is the torsional barrier,  $M$  is the total minima along coordinate (periodicity) in the range  $(0 - 2\pi)$ . Eqn. (S5) can be transformed into Mathieu's equation [9,10] and solved to obtain energy eigenvalues that give the partition function and other thermodynamics parameters.

Pitzer and Gwinn [11] additionally suggested an analytical expression (PG model,  $q_{HR}^{PG}$ ) of the HR partition function by correcting the classical partition function,  $q_{class}$ , with the ratio of the quantum and classical HO partition function,  $q_{HO}$  and  $q_{CHO}$ , respectively.

$$q_{HR}^{PG} = q_{class} \left( \frac{q_{HO}}{q_{CHO}} \right) \quad (S7)$$

$$q_{CHO} = \frac{k_B T}{h\nu} \quad (S8)$$

$$q_{class} = \frac{(2\pi k_B T)^{1/2}}{h} \int_0^{2\pi/M} I_r^{1/2} e^{-\frac{V_0}{2RT}(1-\cos M\varphi)} d\varphi \quad (S9)$$

Where  $\nu$  is the torsional frequency,  $h$  is Planck's constant, and  $R$  is the gas constant. When symmetric HR is considered,  $I_r$  remains constant. Thus, solving eqn. (S9), we get

$$q_{class} = q_{FR} e^{-\frac{V_0}{2RT} I_0(V_0/RT)} \quad (S10)$$

Where  $I_0$  is the modified Bessel function of the first type of zeroth-order [12] and  $I_r$  is the moment of inertia that can be obtained from the exact method of PG. Again, the total  $q_{FR}$  is the free rotor partition function given by

$$q_{FR} = \frac{(8\pi^3 I_{eff} k_B T)^{1/2}}{Mh} \quad (S11)$$

Where  $I_{eff} = I_{R_1} I_{R_2} / (I_{R_1} + I_{R_2})$ ,  $R_1$ , and  $R_2$  are two fragments rotating relative to each other through the torsional axis, and  $I_{R_1}$  and  $I_{R_2}$  are their respective moments of inertia.

Subsequently, Hui-yun [13] developed the Modified Pitzer-Gwinn (MPG) method, based on the PG approach, to achieve high accuracy at elevated temperatures. For high temperatures, the

partition function by MPG method ( $q_{HR}^{MPG}$ ) provides accurate values compared to  $q_{HR}^{PG}$ , but it failed when  $T \rightarrow 0$  [2].

To overcome this failure, Truhlar introduced a new method (correction to the PG model,  $q_{HR}^{T91}$ ) for the calculation of the partition function that works at low temperatures. Thus,  $q_{HR}^{T91}$  can be written as [2,4,13]

$$q_{HR}^{T91} = q_{HO} \tanh\left(\frac{q_{FR}}{q_{CHO}}\right) \quad (S12)$$

Later, more corrections to the PG model were proposed by McClurg, Flagen, and Goddard [14-16] (MFG) and Ayala and Schlegel [12] (AS) that adjust the partition function by introducing a multiplicative factor.

The MFG scheme ( $q_{HR}^{MFG}$ ) employs the Padé approximation [15] to correct the overestimation of the zero-point energy (ZPE) [16].

$$q_{HR}^{MFG} = q_{HR}^{PG} \Delta E^{MFG} \quad (S13)$$

Where  $\Delta E^{MFG} = h^2 v^2 / (2hv + 16V_0)$  is the difference between the ZPE of the quantum HO and the HR.

Again, Ayala and Schlegel's approach (AS) [6] aimed to achieve better results for small torsional barriers and high temperatures using a polynomial factor.

$$q_{HR}^{AS} = q_{HR}^{PG} \left( \frac{1+P_2 e^{-V_0/2RT}}{1+P_1 e^{-V_0/2RT}} \right) \quad (S14)$$

Where  $P_1$  and  $P_2$  are fifth-order polynomial functions of  $x = 1/q_{FR}$  and  $y = V_0/RT$ , and the torsional barrier is

$$V_0 = \frac{8\pi^2 v^2 I_r N_A}{M^2} \quad (S15)$$

Where  $N_A$  is the Avogadro's number.

In Gaussian 16 software, the Ayala and Schlegel approach ( $q_{HR}^{AS}$ ), which is the modification of the PG, T91, and MFG approach, is implemented for the calculations of the hindered rotor partition functions.

## References

1. M. J. Frisch, G. W. Trucks, H. B. Schlegel, G. E. Scuseria, M. A. Robb, J. R. Cheeseman, G. Scalmani, V. Barone, G. A. Petersson, H. Nakatsuji, X. Li, M. Caricato, A. V. Marenich, J. Bloino, B. G. Janesko, R. Gomperts, B. Mennucci, H. P. Hratchian, J. V. Ortiz, A. F. Izmaylov, J. L. Sonnenberg, D. WilliamsYoung, F. Ding, F. Lipparini, F. Egidi, J. Goings, B. Peng, A. Petrone, T. Henderson, D. Ranasinghe, V. G. Zakrzewski, J. Gao, N. Rega, G. Zheng, W. Liang, M. Hada, M. Ehara, K. Toyota, R. Fukuda, J. Hasegawa, M. Ishida, T. Nakajima, Y. Honda, O. Kitao, H. Nakai, T. Vreven, K. Throssell, J. A. Montgomery, Jr., J. E. Peralta, F. Ogliaro, M. J. Bearpark, J. J. Heyd, E. N. Brothers, K. N. Kudin, V. N. Staroverov, T. A. Keith, R. Kobayashi, J. Normand, K. Raghavachari, A. P. Rendell, J. C. Burant, S. S. Iyengar, J. Tomasi, M. Cossi, J. M. Millam, M. Klene, C. Adamo, R. Cammi, J. W. Ochterski, R. L. Martin, K. Morokuma, O. Farkas, J. B. Foresman and D. J. Fox, *Gaussian 16 Revision C.01*, 2016, Gaussian Inc. Wallingford CT.
2. E. Dzib and G. Merino, *Wiley Interdiscip. Rev. Comput. Mol. Sci.*, 2022, **12**, e1583 (1–25).
3. E. Dzib, J. L. Cabellos, F. O. Chi, S. Pan, A. Galeno and G. Merino, *Int. J. Quantum Chem.*, 2022, **119**, e25686 (1–10).
4. C. N. Banwell, *Fundamentals of Molecular Spectroscopy*, McGrawhill, 1966.
5. C. Cervinka, M. Fulem, and K. Ruzicka, *J. Chem. Eng. Data.*, 2012, **57**, 227–232.
6. P. Y. Ayala and H. B. Schlegel, *J. Chem. Phys.*, 1998, **108**, 2314–2325.
7. Y. Gao, T. He, X. Li, and X. You, *Phys. Chem. Chem. Phys.*, 2019, **21**, 1928–1936.
8. K. S. Pitzer and W. D. Gwinn, *J. Chem. Phys.*, 1946, **14**, 239–243.
9. G. B. Arfken and H. J. Weber, *Mathematical methods for Physicist*, 6<sup>th</sup> Edition, New York, NY, *Elsevier*, 2005.
10. M. Gadella, H. Giacomini, L. P. Lara, *Appl. Math. Comput.*, 2015, **271**, 436–445.
11. K. S. Pitzer, and D. G. William, *J. Chem. Phys.*, 1942, **10**, 428–440.
12. P. Hui-Yun, *J. Chem. Phys.*, 1987, **87**, 4846–4848.
13. D. G. Truhlar, *J. Comput. Chem.* 1991, **12**, 266–270.
14. R. B. McClurg, R. C. Flagan, and W. A. Goddard III, *J. Chem. Phys.*, 1997, **106**, 6675–6680.
15. R. B. McClurg, *J. Chem. Phys.*, 1998, **108**, 1748–1749.
16. R. B. McClurg, *J. Chem. Phys.*, 1999, **111**, 7163–7164.

**Table S24:** Calculated Eckart tunneling contributions ( $\Gamma_x$ ,  $x = \text{OH-1A}, \text{OH-2A}, \text{OH-3A}, \text{OH-4A}$ ) for all the four reaction channels (R1A, R2A, R3A, R4A) involved in the reaction of DTP with  $\cdot\text{OH}$  in the temperature range of 200-400 K using Eyringpy Program code at the **M06-2X level of theory**.

| Temperature | $\Gamma_{\text{OH-1A}}$ | $\Gamma_{\text{OH-2A}}$ | $\Gamma_{\text{OH-3A}}$ | $\Gamma_{\text{OH-4A}}$ |
|-------------|-------------------------|-------------------------|-------------------------|-------------------------|
| 200         | 642                     | 1011.7                  | 1.3                     | 1.3                     |
| 220         | 200                     | 297.7                   | 1.3                     | 1.3                     |
| 240         | 81.3                    | 115                     | 1.2                     | 1.2                     |
| 260         | 40.3                    | 54.5                    | 1.2                     | 1.2                     |
| 280         | 23.2                    | 30.2                    | 1.2                     | 1.1                     |
| 298         | 15.5                    | 19.5                    | 1.1                     | 1.1                     |
| 300         | 14.9                    | 18.8                    | 1.1                     | 1.1                     |
| 320         | 10.5                    | 12.8                    | 1.1                     | 1.1                     |
| 340         | 7.8                     | 9.4                     | 1.1                     | 1.1                     |
| 360         | 6.2                     | 7.2                     | 1.1                     | 1.1                     |
| 380         | 5.1                     | 5.8                     | 1.1                     | 1.1                     |
| 400         | 4.3                     | 4.9                     | 1.1                     | 1.1                     |



**Table S25:** Calculated Eckart tunneling contributions ( $\Gamma_x$ ,  $x = \text{Cl-1B}, \text{Cl-2B}, \text{Cl-3B}, \text{Cl-4B}$ ) for all the four reaction channels (R1B, R2B, R3B, R4B) involved in the reaction of DTP with Cl-atom in the temperature range of 200-400 K using Eyringpy Program code at the **M06-2X level of theory**.

| Temperature | $\Gamma_{\text{Cl-1B}}$ | $\Gamma_{\text{Cl-2B}}$ | $\Gamma_{\text{Cl-3B}}$ | $\Gamma_{\text{Cl-4B}}$ |
|-------------|-------------------------|-------------------------|-------------------------|-------------------------|
| 200         | 12.3                    | 20.1                    | 1.1                     | 1.2                     |
| 220         | 7.2                     | 10.4                    | 1.1                     | 1.2                     |
| 240         | 5                       | 6.6                     | 1.1                     | 1.1                     |
| 260         | 3.8                     | 4.7                     | 1.1                     | 1.1                     |
| 280         | 3.1                     | 3.7                     | 1.1                     | 1.1                     |
| 298         | 2.7                     | 3.1                     | 1.1                     | 1.1                     |
| 300         | 2.6                     | 3.1                     | 1.1                     | 1.1                     |
| 320         | 2.3                     | 2.7                     | 1.1                     | 1.1                     |
| 340         | 2.1                     | 2.4                     | 1                       | 1.1                     |
| 360         | 1.9                     | 2.1                     | 1                       | 1.1                     |
| 380         | 1.8                     | 2                       | 1                       | 1.1                     |
| 400         | 1.7                     | 1.8                     | 1                       | 1                       |

**Table S26: Branching ratio** for the reaction of DTP with OH-radical in the 200-400 K temperature range.

| <i>Temperature</i> | <i>k<sub>1A</sub></i> | <i>k<sub>2A</sub></i> | <i>k<sub>3A</sub></i> | <i>k<sub>4A</sub></i> |
|--------------------|-----------------------|-----------------------|-----------------------|-----------------------|
| 200                | 50.00                 | 50.00                 | 0.00                  | 0.00                  |
| 220                | 52.18                 | 47.82                 | 0.00                  | 0.00                  |
| 240                | 52.88                 | 47.12                 | 0.00                  | 0.00                  |
| 260                | 54.94                 | 45.06                 | 0.00                  | 0.00                  |
| 280                | 56.32                 | 43.68                 | 0.00                  | 0.00                  |
| 298                | 57.03                 | 42.97                 | 0.00                  | 0.00                  |
| 300                | 57.05                 | 42.95                 | 0.00                  | 0.00                  |
| 320                | 57.38                 | 42.62                 | 0.00                  | 0.00                  |
| 340                | 58.49                 | 41.51                 | 0.00                  | 0.00                  |
| 360                | 58.87                 | 41.13                 | 0.00                  | 0.00                  |
| 380                | 60.33                 | 39.67                 | 0.00                  | 0.00                  |
| 400                | 59.90                 | 40.10                 | 0.00                  | 0.00                  |

**Table S27: Branching ratio** for the reaction of DTP with Cl-atom in the 200-400 K temperature range.

| <i>Temperature</i> | <i>k<sub>1B</sub></i> | <i>k<sub>2B</sub></i> | <i>k<sub>3B</sub></i> | <i>k<sub>4B</sub></i> |
|--------------------|-----------------------|-----------------------|-----------------------|-----------------------|
| 200                | 91.257                | 8.743                 | 0.000                 | 0.000                 |
| 220                | 90.013                | 9.987                 | 0.000                 | 0.000                 |
| 240                | 88.989                | 11.011                | 0.000                 | 0.000                 |
| 260                | 87.619                | 12.381                | 0.000                 | 0.000                 |
| 280                | 86.346                | 13.654                | 0.000                 | 0.000                 |
| 298                | 85.214                | 14.786                | 0.000                 | 0.000                 |
| 300                | 85.499                | 14.501                | 0.000                 | 0.000                 |
| 320                | 83.785                | 16.215                | 0.000                 | 0.000                 |
| 340                | 83.195                | 16.805                | 0.000                 | 0.000                 |
| 360                | 81.830                | 18.170                | 0.000                 | 0.000                 |
| 380                | 81.359                | 18.641                | 0.000                 | 0.000                 |
| 400                | 79.913                | 20.087                | 0.000                 | 0.000                 |

#### Notes 4: Radiative Efficiency Calculations.

##### Frequencies and their Intensities

The RE was calculated using the vibrational frequencies in the atmospheric window of 600-1600  $\text{cm}^{-1}$  with respect to their corresponding intensities. The reactant is more effective if it absorbs in this range [1,2]. Studies have revealed that even if this compound absorbs at other wavelength with strong absorption, the additional absorption will not contribute significantly to radiative forcing. All the frequencies are in  $\text{cm}^{-1}$ .

**Table S28:** Frequencies and Intensities of  $\text{CF}_3\text{CH}_2\text{CFCl}_2$  calculated at the **M06-2X** level of theory.

| Frequency | Intensities | RF per unit cross-section | Product  |
|-----------|-------------|---------------------------|----------|
| 24.93     | 0.0274      | 0.0145                    | 0.0003   |
| 120.20    | 1.5627      | 0.1740                    | 0.2719   |
| 141.77    | 0.9981      | 0.2550                    | 0.2545   |
| 230.54    | 0.0319      | 0.4200                    | 0.0133   |
| 240.29    | 0.6811      | 0.5140                    | 0.3500   |
| 304.58    | 0.5035      | 0.6780                    | 0.3413   |
| 329.40    | 0.0147      | 0.7320                    | 0.0107   |
| 385.13    | 0.5450      | 1.0600                    | 0.5777   |
| 409.07    | 0.7238      | 1.2800                    | 0.9264   |
| 468.78    | 3.3393      | 1.6500                    | 5.5098   |
| 539.03    | 3.1031      | 2.2000                    | 6.8268   |
| 550.24    | 1.3378      | 2.2100                    | 2.9565   |
| 655.79    | 53.6284     | 0.0573                    | 3.0729   |
| 706.63    | 53.1765     | 0.5100                    | 27.1200  |
| 839.21    | 85.6440     | 3.2300                    | 276.6301 |
| 890.83    | 51.7143     | 3.1000                    | 160.3143 |
| 930.93    | 39.2821     | 2.9500                    | 115.8821 |
| 1029.06   | 21.9293     | 1.4700                    | 32.2360  |
| 1177.02   | 88.6612     | 1.5200                    | 134.7650 |
| 1193.54   | 196.4481    | 1.5200                    | 298.6011 |
| 1223.37   | 247.2957    | 1.1500                    | 284.3900 |
| 1306.74   | 196.1598    | 0.2070                    | 40.6050  |
| 1339.23   | 67.5589     | 0.2370                    | 16.0114  |
| 1410.88   | 150.2967    | 0.0980                    | 14.7290  |
| 1460.40   | 11.2224     | 0.0917                    | 1.0290   |

$$\begin{aligned}
 \text{RE} &= (\sum v \times A_k) \times 1.66 \times 10^{-19} \times 10^{15} \text{ Wm}^{-2} \text{ ppb}^{-1} \\
 &= 1405.3865 \times 1.66 \times 10^{-19} \times 10^{15} \text{ Wm}^{-2} \text{ ppb}^{-1} \\
 &= 0.2333 \text{ W m}^{-2} \text{ ppb}^{-1}
 \end{aligned}$$

Also,  $f(\tau) = 0.949$

Again, a 10% increment in the RE on account of temperature adjustment in the stratosphere gives final RE = 0.246 W m<sup>-2</sup> ppb<sup>-1</sup>.

### **References**

1. Ø. Hodnebrog, M. Etminan, J. Fuglestedt, G. Marston, G. Myhre, C. Nielsen, K. P. Shine and T. J. Wallington, *Rev. Geophys.*, 2013, **51**, 300–378.
2. Ø. Hodnebrog, B. Aamaas, J. S. Fuglestedt, G. Marston, G. Myhre, C. J. Nielsen, M. Sandstad, K. P. Shine and T. J. Wallington, *Rev. Geophys.*, 2020, **58**, e2019RG000691.
